1 **Bidirectional modulation of pain-related behaviors in the zona incerta**

2 Abbreviated title: Contribution of ZI to persistent pain

3

4 Sudhuman Singh<sup>1</sup>, Spring Valdivia<sup>1</sup>, Omar Soler-Cedeño<sup>1</sup>, Anisha P. Adke<sup>1</sup>, Barbara Benowitz<sup>1</sup>,  
5 Daniela Velasquez<sup>1</sup>, Torri D. Wilson<sup>1</sup>, Yarimar Carrasquillo<sup>1#</sup>

6

7 <sup>1</sup>National Center for Complementary and Integrative Health, National Institute of Health,  
8 Bethesda, MD, United States

9

10 #Correspondence

11 Yarimar Carrasquillo, PhD

12 National Center for Complementary and Integrative Health

13 National Institutes of Health

14 35 Convent Drive

15 Building 35A / Room 1E-410

16 Bethesda, MD 20892

17 Phone: 301-451-8147

18 Fax: 301-480-0772

19 Email: [yarimar.carrasquillo@nih.gov](mailto:yarimar.carrasquillo@nih.gov)

20

21 **Abstract**

22 Central amygdala neurons expressing protein kinase C-delta (CeA-PKC $\delta$ ) are sensitized  
23 following nerve injury and promote pain-related responses in mice. The neural circuits  
24 underlying modulation of pain-related behaviors by CeA-PKC $\delta$  neurons, however, remain  
25 unknown. In this study, we identified a functional monosynaptic inhibitory neural circuit  
26 that originates in CeA-PKC $\delta$  neurons and terminates in the ventral region of the zona  
27 incerta (ZI), a subthalamic structure previously linked to pain processing. Behavioral  
28 experiments further show that chemogenetic inhibition of GABAergic ZI neurons is  
29 sufficient to induce bilateral hypersensitivity in uninjured mice as well as contralateral  
30 hypersensitivity after nerve injury. In contrast, chemogenetic activation of GABAergic ZI  
31 neurons reverses nerve injury-induced hypersensitivity, demonstrating that silencing of  
32 the ZI is required for injury-induced behavioral hypersensitivity. Our results identify a  
33 previously unrecognized inhibitory efferent pathway from CeA-PKC $\delta$  neurons to the ZI  
34 and demonstrate that ZI-GABAergic neurons can bidirectionally modulate pain-related  
35 behaviors in mice.

36 **Keywords:** pain, central amygdala, protein kinase C delta, zona incerta, GABAergic  
37 neurons, amygdala circuit, pain pathways

38

39

## 40 **Introduction**

41 Persistent pain resulting from lesions or diseases affecting the peripheral and  
42 central nervous system can severely affect a person's life over time if left untreated  
43 (Dworkin, 2002; Treede et al., 2008). Understanding the neural circuits underlying pain  
44 processing and how they are recruited in a maladaptive manner following injury is crucial  
45 for the development of improved treatment options for persistent pain. Several  
46 neuroimaging, pharmacological and electrophysiological studies in humans and animals  
47 demonstrate that the amygdala is a key locus in persistent pain processing (Bernard and  
48 Besson, 1990; Zald, 2003; Neugebauer et. al., 2004; Carrasquillo and Gereau, 2007;  
49 Bushnell et. al., 2013). A recent study further demonstrated that the CeA can both  
50 enhance and decrease pain-related behaviors in a cell-type-specific manner (Wilson et  
51 al., 2019). CeA neurons expressing protein kinase C-delta (CeA-PKC $\delta$ ), for example, are  
52 sensitized by nerve injury and promote pain-related responses. In contrast, neurons  
53 expressing somatostatin are inhibited by nerve injury and promote decreases in pain-  
54 related behaviors. The circuit and cellular mechanisms responsible for bidirectional  
55 modulation of pain-related responses in the CeA, however, are still unclear.

56 In the present study, we began to address this question by characterizing the  
57 efferent projections from CeA-PKC $\delta$  neurons. Our cell-type-specific anatomical  
58 experiments identified the zona incerta (ZI) as one of the efferent targets of CeA-PKC $\delta$   
59 neurons. The ZI is a subthalamic nucleus located ventrolateral to the medial lemniscus  
60 and dorsomedial to the substantia nigra (Ricardo,1981). The ZI is comprised of  
61 heterogeneous groups of cells defined by the expression of molecular markers such as  
62 parvalbumin, tyrosine hydroxylase, somatostatin, calbindin, and glutamate (Mitrofanis,

63 2005). The functions of the ZI are not fully understood but recent studies suggest that this  
64 brain region contributes to fear conditioning (Zhou et al., 2018) binge eating (Zhang and  
65 Van Den Pol, 2017), defensive behaviors (Chou et al., 2018) and predatory hunting (Zhao  
66 et al., 2019). In rodent models of pain, changes in neural activity have been reported in  
67 the ZI (Masri et al., 2009) and behavioral studies further show that experimentally  
68 modulating the activity of ZI neurons alters behavioral hypersensitivity (Petronilho et. al.,  
69 2012; Moon and Park, 2017; Hu et. al., 2019; Wang et. al., 2020). Most of the literature  
70 suggests, for example, that the ZI is inhibited in the context of pain and that inhibition  
71 drives behavioral hypersensitivity (Masri et. al., 2009; Moon et. al., 2016; Moon and Park,  
72 2017; Hu et. al., 2019). A recent study, however, suggests the opposite- the ZI is activated  
73 in the context of pain and increases in neuronal activity drive hypersensitivity (Wang et.  
74 al., 2020). These seemingly conflicting results suggest that modulation of pain in the ZI is  
75 complex and, most likely, cell-type and circuit-specific. Identifying the sources of  
76 excitation and inhibition of ZI neurons in the context of pain will be important to begin  
77 untangling the mechanisms underlying modulation of pain in the ZI.

78         Based on our anatomical findings demonstrating a projection from CeA-PKC $\delta$   
79 neurons to the ZI, in combination with previous work showing that CeA-PKC $\delta$  neurons  
80 are GABAergic and display increases in activity following injury, we hypothesized that  
81 inhibitory inputs from CeA-PKC $\delta$  neurons are a source of pain-related inhibition in the ZI  
82 that results in increases in pain-related behaviors. In the present study, we tested this  
83 hypothesis using a combination of cell-type-specific anatomical traces, opto-assisted  
84 circuit mapping, chemogenetic manipulations and behavioral assays to measure  
85 hypersensitivity in mice. Our combined results show that there is a functional

86 monosynaptic inhibitory efferent pathway from CeA-PKC $\delta$  neurons to the ZI and further  
87 demonstrate that ZI-GABAergic neurons can bidirectionally modulate pain-related  
88 behaviors in mice.

89

## 90 **Results**

### 91 **Identification of CeA-PKC $\delta$ neuronal efferent targets**

92 The neural pathways underlying modulation of pain-related behaviors by CeA-  
93 PKC $\delta$  neurons remains unknown. To begin to address this question, we stereotaxically  
94 injected a cre-dependent adeno-associated virus (AAV) anterograde tracer (ChrimsonR  
95 or mCherry) into the CeA of *Prkcd*-cre mice (**Figure 1A**). The transduction of ChrimsonR  
96 or mCherry in CeA-PKC $\delta$  cells was confirmed with immunostaining for PKC $\delta$  (**Figure 1B**).  
97 Mapping of ChrimsonR (or mCherry) positive axonal terminals revealed CeA-PKC $\delta$   
98 efferent projections with dense, moderate and sparse labeling in 17 brain regions  
99 throughout the brain, including the basal forebrain, striatum, thalamus, hypothalamus,  
100 midbrain, pons and medulla (**Figure 1C-D** and **Table 1**). All 17 brain regions identified in  
101 our experiments have been previously defined as output regions of the CeA using  
102 traditional anterograde tracers (Shinonaga et al., 1992; Reardon and Mitrofanis, 2000;  
103 Barbier et al., 2017; Zhou et al., 2018; Aggleton, 2000), validating our experimental  
104 approach to study the efferent projections of CeA-PKC $\delta$  neurons.

105 Semi-quantitative analysis, performed by visual examination of high magnification  
106 images, further revealed that axonal terminals in the output regions of CeA-PKC $\delta$  neurons  
107 have different terminal densities and organization patterns. Most of the brain regions

108 identified had either few or moderate numbers of terminals, with only three regions,  
109 including the bed nucleus of stria terminalis, extended amygdala and parabrachial  
110 nucleus, containing high densities of labeling (**Figure 1C-D** and **Table 1**).

111 As summarized in **Table 1**, dense to moderate labeling was consistently seen in  
112 the bed nucleus of stria terminalis, extended amygdala and central amygdala of all 5  
113 brains analyzed. Dense labeling was also seen in the lateral parabrachial nucleus of 3 of  
114 the 5 brains analyzed, with sparse labeling observed in 1 brain and no labeling in the  
115 other brain. Moderate to sparse labeling was consistently observed in the substantia  
116 innominata in all 5 brains; in the zona incerta, para-subthalamic nucleus, substantia nigra  
117 and reticular formation in 4 of 5 brains; and in the subthalamic nucleus and ventral  
118 tegmental area in 3 of the 5 brains analyzed. Lastly, sparse labeling was consistently  
119 seen in the globus pallidus, lateral preoptic area and lateral hypothalamus in all 5 brains;  
120 in the locus coeruleus in 4 of 5 brains and in the pedunclopontine tegmental nucleus,  
121 laterodorsal tegmental nucleus and periaqueductal grey in 3 of the 5 brains. Consistent  
122 with previous studies using traditional anterograde tracers in the CeA (Shinonaga et al.,  
123 1992; Reardon and Mitrofanis, 2000; Barbier et al., 2017; Zhou et al., 2018; Aggleton,  
124 2000), no terminal labeling was observed in cortical regions of any of the 5 brains  
125 evaluated.

126 Mapping of the injection sites in all 5 brains shows that all injections were restricted  
127 to the CeA (**Figure 1 – figure supplement 1**). The number of transduced neurons in  
128 these mice were comparable to the expression levels of PKC $\delta$ -tdTomato neurons in the  
129 CeA of *Prkcd-cre::Ai9* mice, demonstrating robust transduction efficiency in these

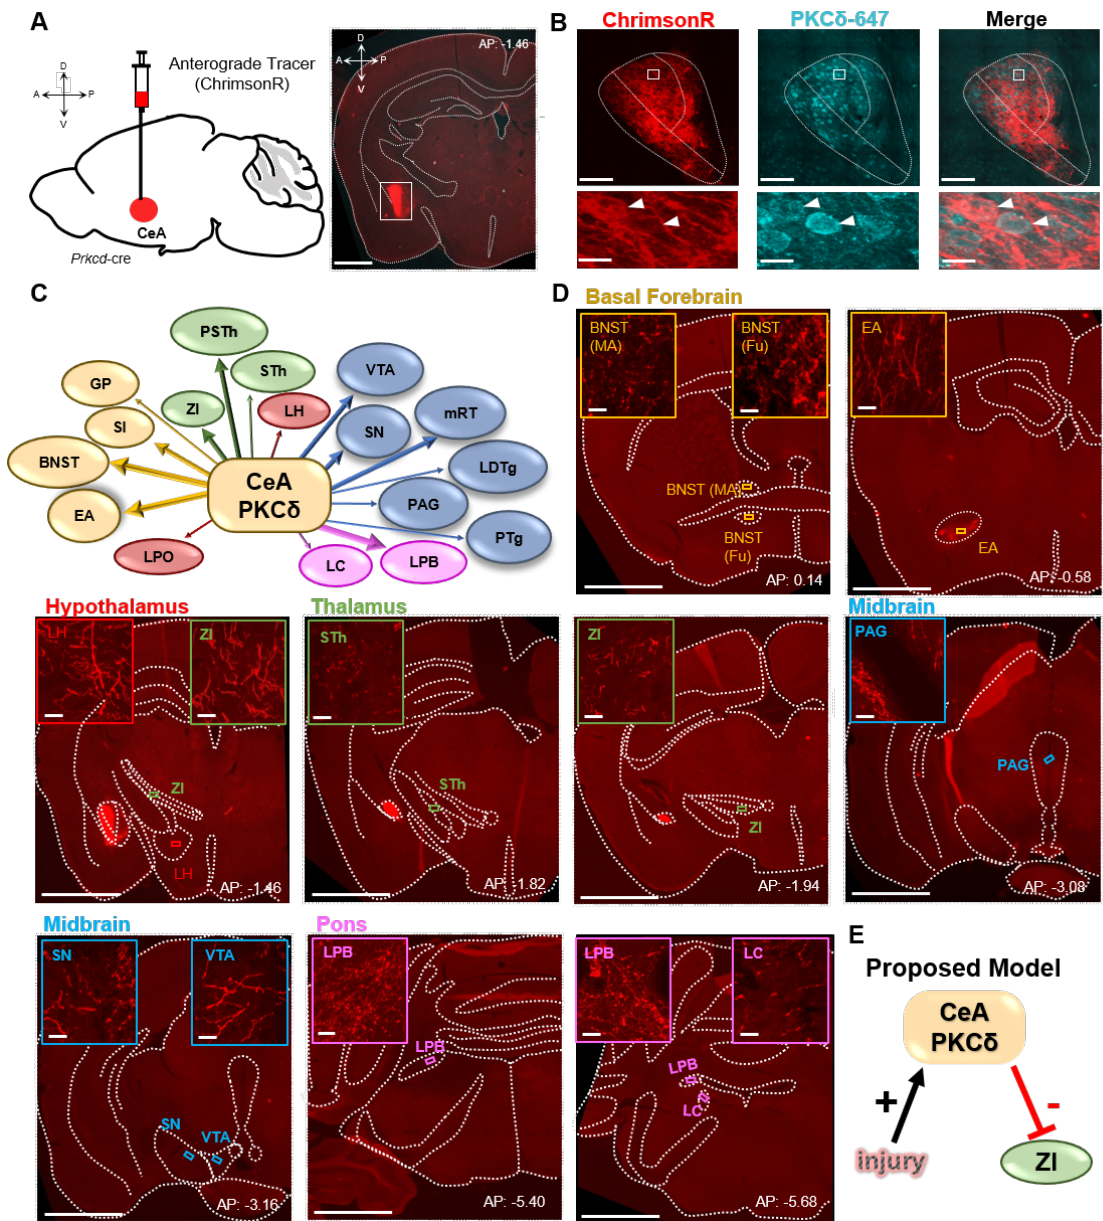

**Figure 1.** CeA-PCK $\delta$  neurons efferent targets. **(A)** Schematic of experimental approach. ChrimsonR-tdTomato was unilaterally injected into the CeA of a PKC $\delta$ -cre mouse. A representative coronal brain slice of an injected mouse is shown on the right panel, with ChrimsonR-tdTomato shown in red. Scale bar represents 1000  $\mu$ M. **(B)** Representative high magnification images of the CeA in a coronal brain slice of a ChrimsonR-tdTomato injected mouse. ChrimsonR-transduced cells are shown in red and neurons immunostained for PKC $\delta$  in cyan. The merged image is shown on the right panel. Lower insets depict higher magnification images of the areas delineated by the white box in the upper images. White arrowheads highlight representative transduced cells that are also positive for PKC $\delta$ . Scale bars represent 100  $\mu$ M for low magnification and 10  $\mu$ M for high magnification images. **(C)** Summary diagram illustrating CeA-PCK $\delta$  neuron efferent projections within the brain. Forebrain regions are shown in yellow, hypothalamic structures in red, thalamus in green, midbrain in blue and pons in fuchsia. The thickness of the arrows depict the density of labeling (sparse, moderate or dense). **(D)** Low magnification representative images of brain regions with axonal terminals from CeA-PCK $\delta$  cells. Insets in each image are high magnification images depicting axonal terminals within the regions delineated by the boxes in the respective low magnification images. Scales are 1000  $\mu$ M for low magnification images and 20  $\mu$ M for high magnification images. bed nucleus of stria terminalis medial (BNST-MA); bed nucleus of stria terminalis fusiform nucleus (BNST-Fu); extended amygdala (EA); substantia innominata (SI); lateral preoptic area (LPO); globus pallidus (GP); lateral hypothalamus (LH); Subthalamic nucleus (STh); Zona incerta (ZI); Paraventricular nucleus (PSTh); periaqueductal grey (PAG); substantia nigra (SNR); ventral tegmental area (VTA); pedunculopontine tegmental nucleus (PTg); laterodorsal tegmental nucleus (LDTg); reticular formation (mRT); lateral parabrachial (LPB); locus coeruleus (LC). **See Figure1 – figure supplement 1.**



**Table 1. CeA-PKC $\delta$  Neuronal Efferent Targets**

| Area                                | Abbreviations | ET 987<br>(ChrimsonR) | ET 903<br>(ChrimsonR) | ET832<br>(mCherry) | ET835<br>(mCherry) | Allen Brain Atlas<br>(EGFP) |
|-------------------------------------|---------------|-----------------------|-----------------------|--------------------|--------------------|-----------------------------|
| <b>Striatum and Basal Forebrain</b> |               |                       |                       |                    |                    |                             |
| Bed nucleus of stria terminalis     | BNST          | +++                   | +++                   | +++                | +++                | +++                         |
| Globus pallidus                     | GP            | +                     | +                     | ++                 | +                  | +                           |
| Extended amygdala                   | EA            | +++                   | +++                   | +++                | + / +++            | +++                         |
| Central amygdala                    | CeA           | +++                   | +++                   | ++                 | + / +++            | ++                          |
| Substantia innominata               | SI            | ++                    | ++                    | ++                 | + / +++            | ++                          |
| <b>Thalamus</b>                     |               |                       |                       |                    |                    |                             |
| Subthalamic nucleus                 | STh           | ++                    | +                     | +                  | -                  | -                           |
| Zona Incerta                        | ZI            | ++                    | +                     | ++                 | -                  | +                           |
| Para subthalamic nucleus            | PSTh          | ++                    | ++                    | + / +++            | +                  | -                           |
| <b>Hypothalamus</b>                 |               |                       |                       |                    |                    |                             |
| lateral preoptic area               | LPO           | +                     | +                     | + / +++            | +                  | +                           |
| Lateral hypothalamus                | LH            | +                     | +                     | + / +++            | +                  | +                           |
| <b>Midbrain</b>                     |               |                       |                       |                    |                    |                             |
| Ventral tegmental area              | VTA           | + / +++               | +                     | + / +++            | -                  | -                           |
| Substantia nigra                    | SN            | ++                    | + / +++               | ++                 | +                  | -                           |
| Pedunclopontine tegmental nucleus   | PTg           | +                     | +                     | ++                 | -                  | -                           |
| Laterodorsal tegmental nucleus      | LDTg          | +                     | +                     | -                  | +                  | -                           |
| Periaqueductal grey                 | PAG           | + / +++               | +                     | -                  | +                  | -                           |
| Reticular formation                 | mRT           | + / +++               | +                     | + / +++            | + / +++            | -                           |
| <b>Pons</b>                         |               |                       |                       |                    |                    |                             |
| Lateral parabrachial                | LPB           | +++                   | +++                   | ++ / +++           | +                  | -                           |
| Locus coeruleus                     | LC            | +                     | +                     | ++                 | +                  | -                           |

**Table 1.** Semi-quantitative analysis of the density of axonal terminals in brain regions from 5 PKC $\delta$ -Cre mice stereotaxically injected with a cre-dependent adeno-associated virus anterograde tracer (ChrimsonR, mCherry, EGFP) into the CeA. Rightmost column is from experiment 265945645 of the Mouse Brain Connectivity Atlas of the Allen Brain Institute (<http://connectivity.brain-map.org/>). - no expression; + sparse; ++ moderate; +++ dense



130 experiments. Differences in the size and rostrocaudal distributions of the injections,  
131 however, might explain the differences observed in efferent projections between brains.

### 132 **CeA-PKC $\delta$ neurons send monosynaptic inhibitory projections to the Zona Incerta**

133 The ZI was among the regions identified as an efferent target of CeA-PKC $\delta$   
134 neurons in our anatomical experiments (**Figure 1C**). This subthalamic brain region was  
135 of interest because previous studies have shown that reduced activity in GABAergic  
136 neurons of the ZI correlates with pain-related behaviors (Masri, et al., 2009; Moon et al.,  
137 2016; Moon and Park, 2017; Hu et al., 2019). Given that CeA-PKC $\delta$  neurons are  
138 GABAergic and are activated in the context of pain (Wilson et al., 2019), we hypothesized  
139 that pain-related inhibition of the ZI is mediated by injury-induced activation of CeA-PKC $\delta$   
140 neurons (**Figure 1E**). We began to test this hypothesis by first validating the projections  
141 from CeA-PKC $\delta$  neurons to the ZI using a retrograde tracer approach where the  
142 retrograde tracer cholera toxin B (CTB), conjugated with Alexa Fluor 647, was  
143 stereotaxically injected into the ZI of *Prkcd-cre::Ai9* mice (**Figure 2A**). As illustrated in  
144 **Figure 2B**, the retrograde tracer CTB-647 was readily detected in CeA-PKC $\delta$  neurons  
145 after injection into the ZI, validating the existence of an anatomical pathway from CeA-  
146 PKC $\delta$  neurons to the ZI.

147 To characterize the functional connectivity between CeA-PKC $\delta$  neurons and ZI  
148 GABAergic neurons, we stereotaxically injected AAV-hsyn-ChR2-EYFP into the CeA of  
149 VGAT-cre::Ai9 mice and performed patch-clamp recordings in acute brain slices  
150 containing the ZI (**Figure 3A**). The stable expression of ChR2-EYFP in the CeA is  
151 indicated by the presence of green fluorescent signal in the peri-somatic region of VGAT-  
152 positive neurons in CeA. Consistent with our anatomical findings, tracing of the EYFP-

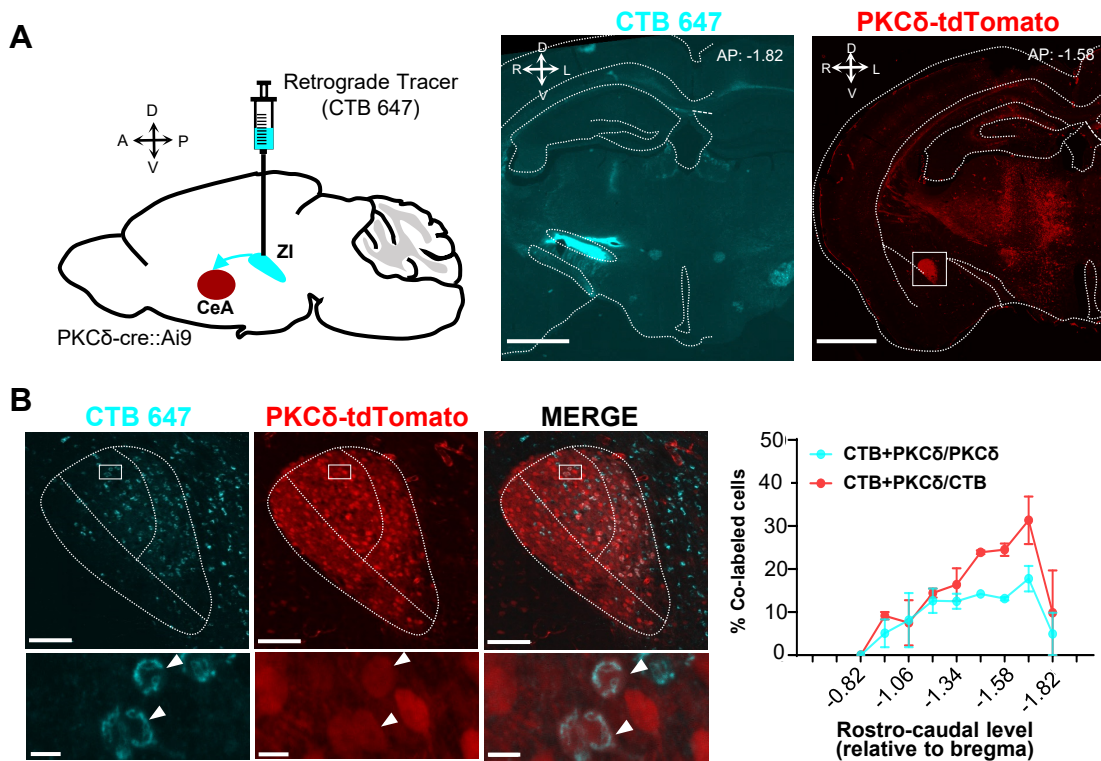

**Figure 2.** Retrograde tracing of CeA-PKC $\delta$  projections to the ZI. **(A)** Schematic drawing of experimental approach (left panel). Cholera toxin B (CTB-647) was injected into the ZI of a PKC $\delta$ -cre::Ai9 mouse brain. A representative coronal brain slice depicting the focal injection of CTB-647 (cyan) into the ZI is shown in the middle panel. A representative coronal brain slice containing the CeA is shown in the right panel. PKC $\delta$ -tdTomato cells are shown in red. The white square delineates the area magnified in panel B. Scale bar represents 1000  $\mu$ M. **(B)** Representative high magnification images of the CeA in a PKC $\delta$ -cre::Ai9 mouse injected with CTB-647 in the ZI. CTB-positive cells are shown in cyan and PKC $\delta$ -tdTomato cells in red. The merged image is shown on the right. Lower insets show higher magnification images of the area delineated by the white squares in the top panel. Arrowheads highlight cells that are positive for CTB and PKC $\delta$ -tdTomato. Scale bars represent 100  $\mu$ M (top panel) and 10  $\mu$ M (bottom panel). The mean  $\pm$  SEM percentage of cells co-labeled for PKC $\delta$  and CTB as a function of the rostro caudal level is shown on the right (n=2 mice, 8 slices per mouse).

153 labeled axonal terminals revealed moderate labeling in both VGAT-positive and VGAT-  
154 negative ZI neurons. Optogenetic stimulation of ChR2-expressing CeA terminals in the ZI  
155 with blue light further showed robust inhibitory post-synaptic currents in 60% VGAT-  
156 positive (12 out of 20 cells) and 53% VGAT-negative (8 out of 15 cells) ZI neurons (**Figure**  
157 **3B**). These optically evoked postsynaptic responses occurred in the presence of TTX and  
158 4-AP, demonstrating that the inputs from the CeA to the ZI are monosynaptic.

### 159 **Inhibition of ZI-GABAergic neurons is sufficient to induce bilateral hypersensitivity**

160 Previous studies have shown that ZI-GABAergic neurons are inhibited in the  
161 context of pain (Masri et al., 2009; Moon et al., 2016; Moon and Park 2017; Hu et al.,  
162 2019). To establish a causal link between reduced activity of ZI-GABAergic neurons and  
163 pain-related behaviors, we utilized a chemogenetic approach coupled with a battery of  
164 pain behavioral assays to measure tactile and thermal sensitivity in naïve mice as well as  
165 in mice with the sciatic nerve cuff model of neuropathic pain. Whole-cell current-clamp  
166 recordings in acute ZI slices prepared from VGAT-cre mice stereotaxically injected with a  
167 cre-dependent AAV encoding the inhibitory designer receptors exclusively activated by  
168 designer drugs (Gi DREADD) hM4Di into the ZI was used to validate hM4Di-mediated  
169 inhibition of ZI neurons (**Figure 4A**). As illustrated in **Figure 4A**, bath application of CNO  
170 (10  $\mu$ M) significantly inhibited firing responses in hM4Di-transduced neurons, with no  
171 measurable effect observed in response to bath application of the saline vehicle control.  
172 Histological verification of injection sites at the end of the experiments further  
173 demonstrated that transduction of hM4Di-mCherry was restricted to the ZI (**Figure 4B**  
174 **and Figure 4 – figure supplement 1**). The numbers and rostrocaudal distribution of  
175 transduced cells within the ZI of mice stereotaxically injected with hM4Di-mCherry was

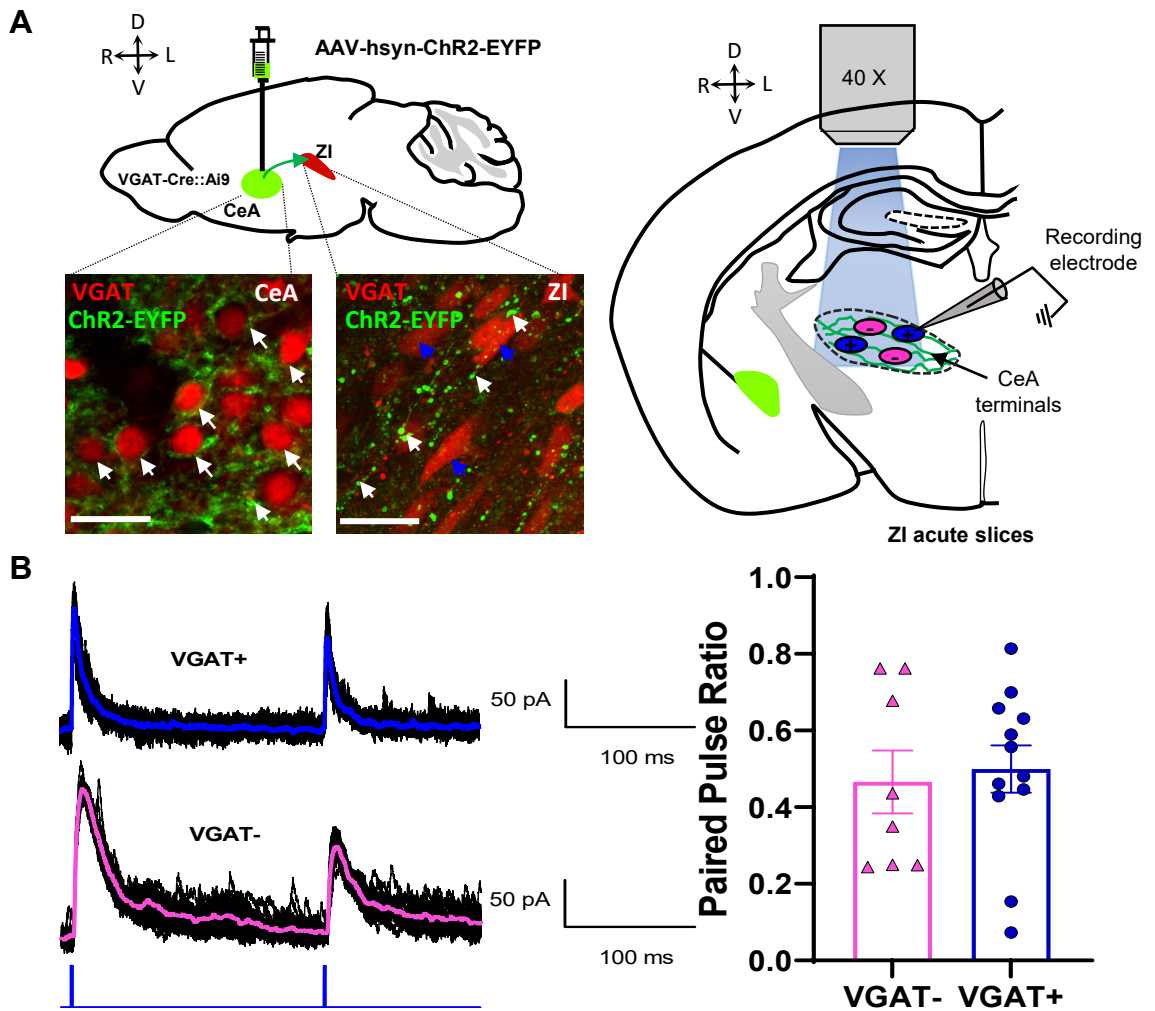

**Figure 3.** Optogenetic activation CeA terminals in the ZI results in robust inhibitory postsynaptic responses. **(A)** Schematics of the experimental approach. VGAT-cre::Ai9 mice were stereotaxically injected with AAV-hsyn-hChR2-EYFP into the CeA. After 4 weeks, ChR2-EYFP is expressed in CeA neurons (perisomatic, white arrows, lower left panel) and in the ZI (CeA terminals, white arrows, lower right panel) in proximity to VGAT positive (blue arrows) cells. Scale bars are 20  $\mu$ M. Schematic diagram for ex-vivo whole-cell recordings in acute ZI brain slices is shown in the right panel. Responses of VGAT-positive (blue) and VGAT-negative (magenta) cells are recorded upon optically activating ChR2-expressing CeA terminals. **(B)** Representative traces showing evoked inhibitory postsynaptic currents in ZI VGAT-positive and VGAT-negative neurons in response to paired pulse stimulation of CeA terminals (5 ms duration, 200 ms inter stimulus interval). The mean  $\pm$  SEM paired pulse ratio is shown on the right panel (n=8 VGAT-negative and 12 VGAT-positive cells).

176 comparable to the numbers and rostrocaudal distribution of VGAT-positive cells in the ZI  
177 of VGAT-Cre::Ai9 mice, demonstrating robust transduction efficiency (**Figure 4C**).

178         The effects of selective chemogenetic inhibition of VGAT-positive ZI cells on pain-  
179 related responses to tactile and pressure stimulation of the hindpaws were measured  
180 before and after i.p. injection of CNO to activate the GiDREADDs, or saline as the vehicle  
181 control in both cuff and sham mice (**Figure 4D**). As expected, following cuff implantation  
182 on the sciatic nerve, tactile and pressure sensitivity was significantly lower in the hindpaw  
183 ipsilateral to cuff implantation compared to the contralateral hindpaw or both hindpaws in  
184 sham treated mice (**Figures 4E-F**). As illustrated in **Figures 4E-F**, chemogenetic  
185 inhibition of VGAT-positive ZI neurons resulted in robust bilateral hypersensitivity to tactile  
186 and pressure stimulation in sham mice as well as contralateral hypersensitivity in cuff-  
187 implanted mice. Thus, compared to pre-injection values, paw withdrawal thresholds in  
188 response to tactile or pinch stimulation were significantly ( $p < 0.0001$ ) reduced bilaterally  
189 following CNO injections in sham mice. Similarly, withdrawal thresholds in the hindpaw  
190 contralateral to cuff implantation were significantly ( $p < 0.0001$ ) reduced after CNO  
191 injection, compared to pre-injection thresholds.

192         Withdrawal thresholds in the hindpaw ipsilateral to cuff treatment were  
193 indistinguishable before and after selective chemogenetic inactivation of VGAT-positive  
194 ZI neurons with CNO in hM4Di ZI-injected mice, demonstrating that inhibition of ZI cells  
195 does not measurably affect cuff-induced hypersensitivity to tactile and pressure  
196 stimulation. Notably, paw withdrawal thresholds in sham mice and the contralateral  
197 hindpaw of cuff-implanted mice following the chemogenetic inhibition of ZI VGAT-positive  
198 neurons were comparable to the withdrawal thresholds measured in the ipsilateral

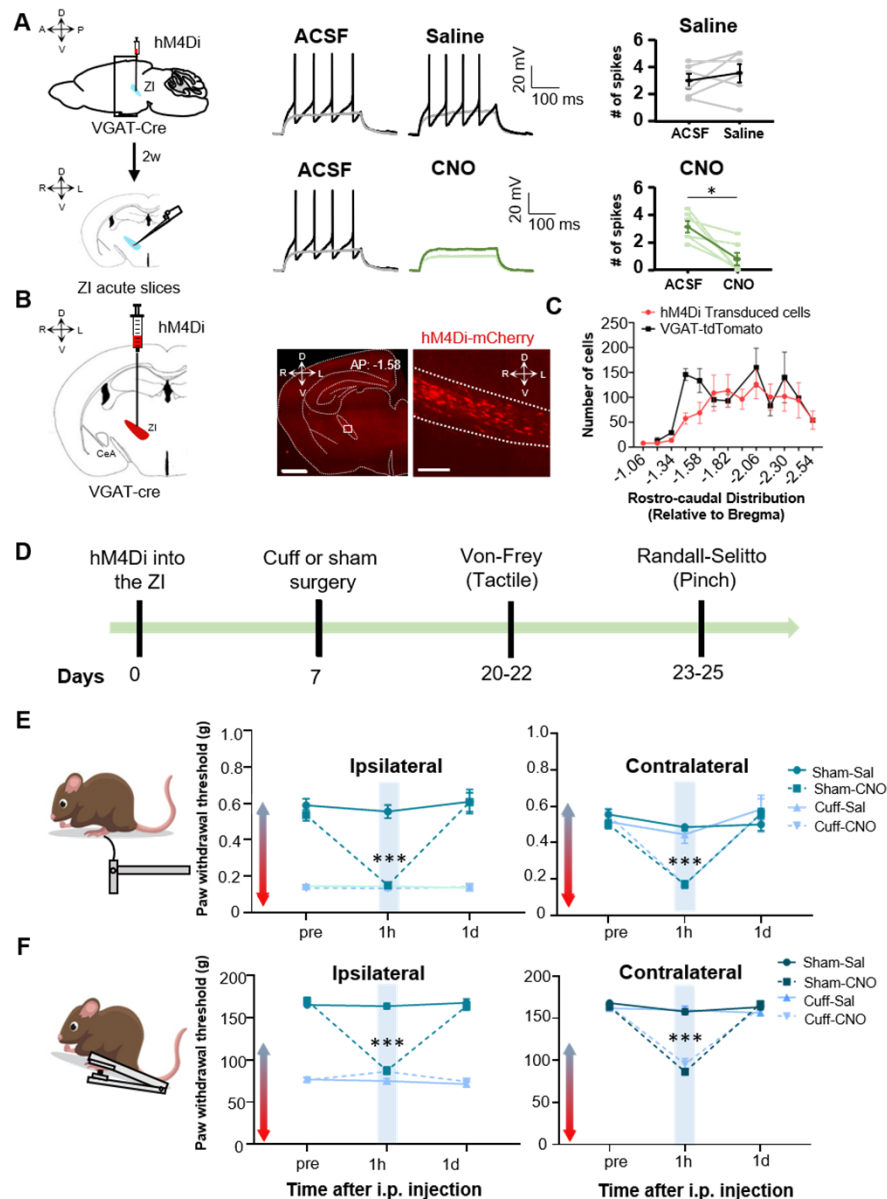

**Figure 4.** Inhibition of ZI GABAergic neurons is sufficient to induce bilateral tactile and pressure hypersensitivity in uninjured mice. **(A)** Schematic of the experimental approach. VGAT-Cre mice were stereotaxically injected with AAV-DIO-hM4Di-mCherry into the ZI. Current-clamp recordings were obtained from mCherry-positive cells in acute ZI slices 2 weeks after the injection. Representative traces of whole-cell current-clamp recording obtained from ZI neurons transduced with hM4Di-mCherry before (left) and after (right) bath application of 10  $\mu$ M CNO (lower panel) or vehicle (top panel). Action potentials were elicited using 500-ms depolarizing current injection that evoked 2 to 5 action potentials before bath application. The same amplitude of depolarizing current injection was used before and after bath application. Summary graphs depicting the mean  $\pm$  SEM number of spikes before and after bath treatment are shown on the right panel ( $n = 6$  neurons per treatment;  $*p < 0.05$  for ACSF vs CNO). **(B)** Schematic diagram for unilateral stereotaxic injection of AAV-DIO-hM4Di-mCherry in ZI region of VGAT-Cre mice. A representative image of a coronal mouse brain slice from a VGAT-Cre mouse injected with AAV-DIO-hM4Di-mCherry into the ZI is shown on the middle panel. The area delineated by the white rectangle in the middle panel is shown at higher magnification in the right panel, with mCherry positive cells shown in red. Scale bars represent 1000  $\mu$ m (left) and 100  $\mu$ m (right). **(C)** Mean  $\pm$  SEM number of hM4Di-transduced cells and VGAT-tdTomato labeled cells in the ZI as a function of rostrocaudal level relative to bregma ( $n=11$  mice for hM4Di-transduced neurons;  $n=4$  mice for VGAT-tdTomato neurons). **(D)** Timeline for behavioral experiments. **(E-F)** Von Frey **(E)** and Randall Selitto **(F)** responses shown as mean  $\pm$  SEM paw withdrawal threshold in the ipsilateral (left panel) and contralateral (right panel) hindpaw before, 1 h and 1 day after CNO or vehicle i.p. injection in cuff or sham mice stereotaxically injected with AAV-DIO-hM4Di-mCherry into the ZI. ( $n=8$  mice per treatment;  $***p < 0.0001$  for pre-injections vs 1 h after CNO in sham-hM4Di CNO treatment for both ipsi and contralateral hindpaws and for cuff-hM4Di-CNO treatment in the contralateral hindpaw; two-way ANOVA followed by Dunnett's multiple comparisons test). **See Figure 4 – figure supplement 1.**



199 hindpaw of cuff-implanted mice, demonstrating that inhibition of these neurons is  
200 sufficient to elicit hypersensitivity in the absence of injury that resembles the  
201 hypersensitivity observed following sciatic nerve cuff implantation. The effects of  
202 chemogenetic inhibition of VGAT-positive ZI neurons on tactile and pressure sensitivity  
203 were transient, as paw withdrawal thresholds in all treated animals returned to pre-  
204 injection values 1 day following the CNO injections. Importantly, tactile and pressure  
205 sensitivity was unaltered in saline-injected mice, demonstrating that the CNO-induced  
206 effects were not due to handling or hM4Di expression (**Figures 4E-F**).

207         Previous studies have demonstrated that modulation of pain-related behaviors in  
208 the CeA, including by CeA-PKC $\delta$  neurons, is modality-dependent (Wilson et., 2019). In  
209 order to evaluate if modulation of hypersensitivity in the ZI is also modality-specific, the  
210 next set of experiments assessed the effects of inhibition of ZI VGAT-positive neurons on  
211 heat and cold sensitivity in both sham and cuff-implanted mice using the Hargreaves and  
212 acetone evaporation tests, respectively. As illustrated in **Figure 5**, cuff implantation in the  
213 sciatic nerve resulted in hypersensitivity to both heat and cold stimulation in the hindpaw  
214 ipsilateral to cuff implantation compared to the contralateral hindpaw or either hindpaw in  
215 sham treated mice. Behavioral responses to cold and heat stimulation of the hindpaws,  
216 however, were unaltered by chemogenetic inhibition of VGAT-positive neurons in the ZI  
217 in all animals tested. Taken together, the results from these chemogenetic experiments  
218 demonstrate that inhibition of VGAT-positive neurons in the ZI is sufficient to induce  
219 hypersensitivity in the absence of injury in a modality-specific manner.

220 **Activation of ZI-GABAergic neurons reverses cuff-induced hypersensitivity to**  
221 **pinch but not thermal stimulation**



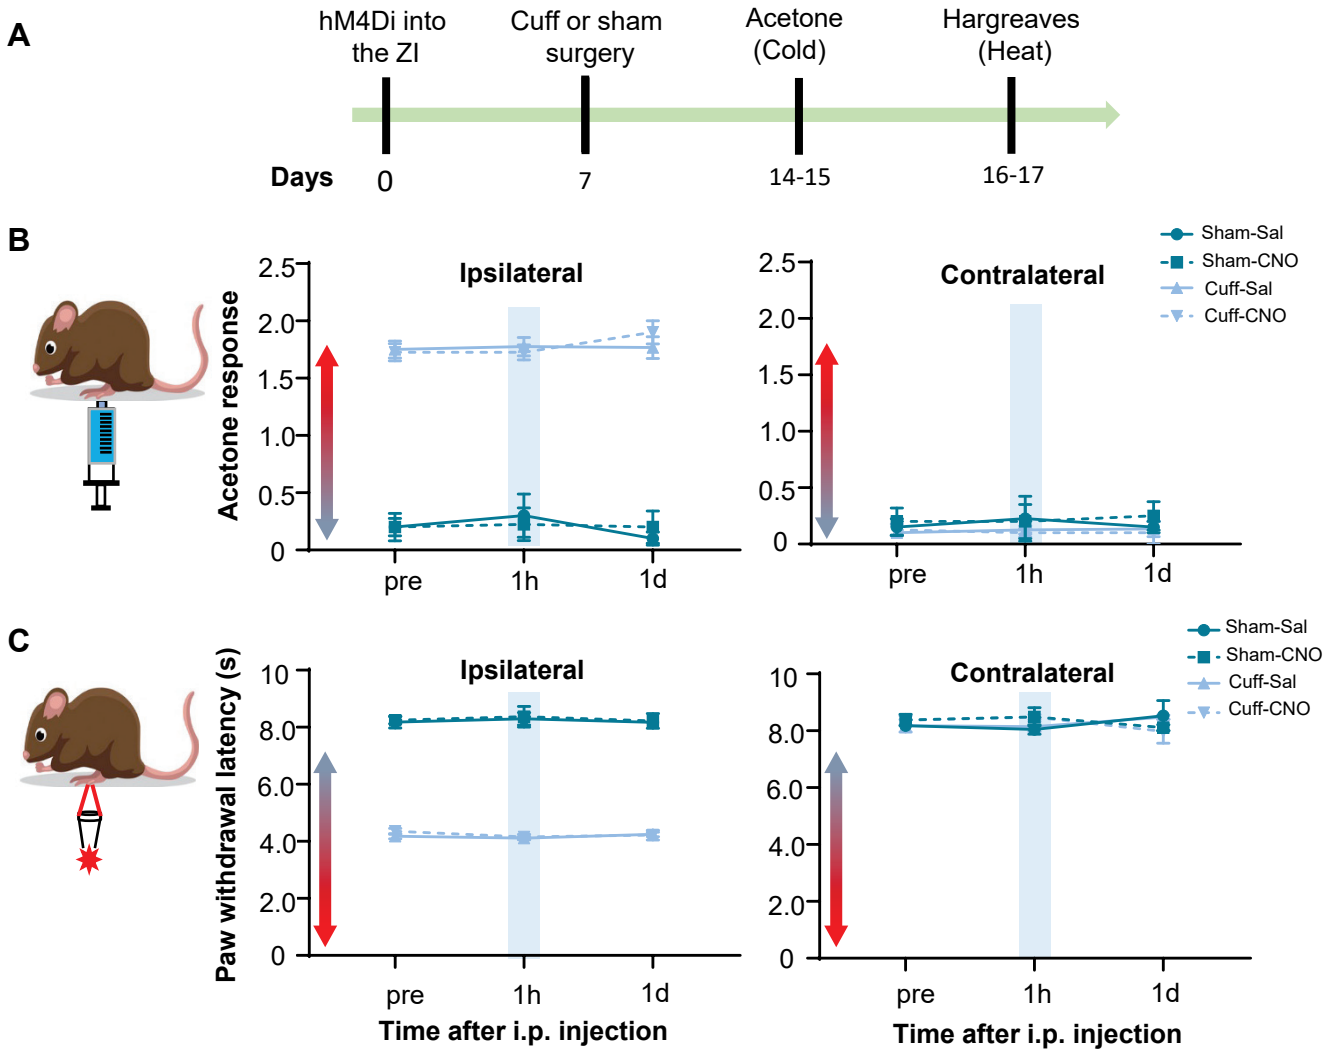

**Figure 5.** Cuff-induced thermal hypersensitivity is unaltered by chemogenetic inhibition of ZI-VGAT cells. (A) Timeline for behavioral experiments. (B-C) Mean  $\pm$  SEM acetone response (B) or paw withdrawal latency obtained from Hargreaves test (C) in the ipsilateral (left panel) and contralateral (right panel) hindpaw before, 1 h and 1 day after CNO or vehicle i.p. injection in cuff or sham mice stereotactically injected with AAV-DIO-hM4Di-mCherry into the ZI. (n=8 mice per treatment; no significant differences were observed in any treatment; two-way ANOVA followed by Dunnett's multiple comparisons test).

222           The next set of experiments aimed to determine whether activation of GABAergic  
223 ZI neurons is sufficient to reverse cuff-induced hypersensitivity. We used a chemogenetic  
224 approach coupled with behavioral assays to measure tactile and heat sensitivity in mice  
225 following the implantation of a sciatic nerve cuff to model neuropathic pain. Histological  
226 verification of the injection sites at the end of the experiments demonstrated that  
227 transduction of hM3Dq-mCherry and control-mCherry was restricted to the ZI (**Figure 6A**  
228 and **Figure 6 – figure supplement 1 and 2**). The numbers and rostrocaudal distribution  
229 of transduced cells within the ZI were comparable in mice injected with hM3Dq-mCherry  
230 and control-mCherry and show robust transduction efficiency that is localized to the ZI  
231 (**Figure 6B**). CNO-mediated activation of neurons in VGAT-Cre mice stereotaxically  
232 injected with AAV8-DIO-hM3Dq-mCherry into the ZI was validated with  
233 immunohistochemical monitoring of c-Fos, the product of an immediate early gene that is  
234 commonly used as a marker of neuronal activity (**Figure 6C**). As illustrated in **Figure 6D**,  
235 i.p. injection of CNO resulted in robust c-Fos expression in the ZI of VGAT-Cre animals  
236 injected with hM3Dq, compared to the c-Fos expression observed in the ZI of saline-  
237 injected control mice that also expressed hM3Dq or CNO-injected control VGAT-Cre mice  
238 stereotaxically injected with the control virus (AAV8-DIO-mCherry). Quantification of ZI  
239 cells co-expressing c-Fos and mCherry further confirms that c-Fos expression in hM3Dq-  
240 transduced cells is significantly ( $p < 0.05$ ) higher in CNO-treated mice than it is in saline-  
241 treated mice or in mCherry-transduced neurons from CNO-treated mice (**Figure 6E**).

242           The effect of chemogenetic activation of VGAT-positive ZI cells on behavioral  
243 responses to pressure (pinching) stimulation of the hindpaws was measured before and  
244 after i.p. injection of CNO or saline in cuff and sham animals (**Figure 6F**). CNO-mediated

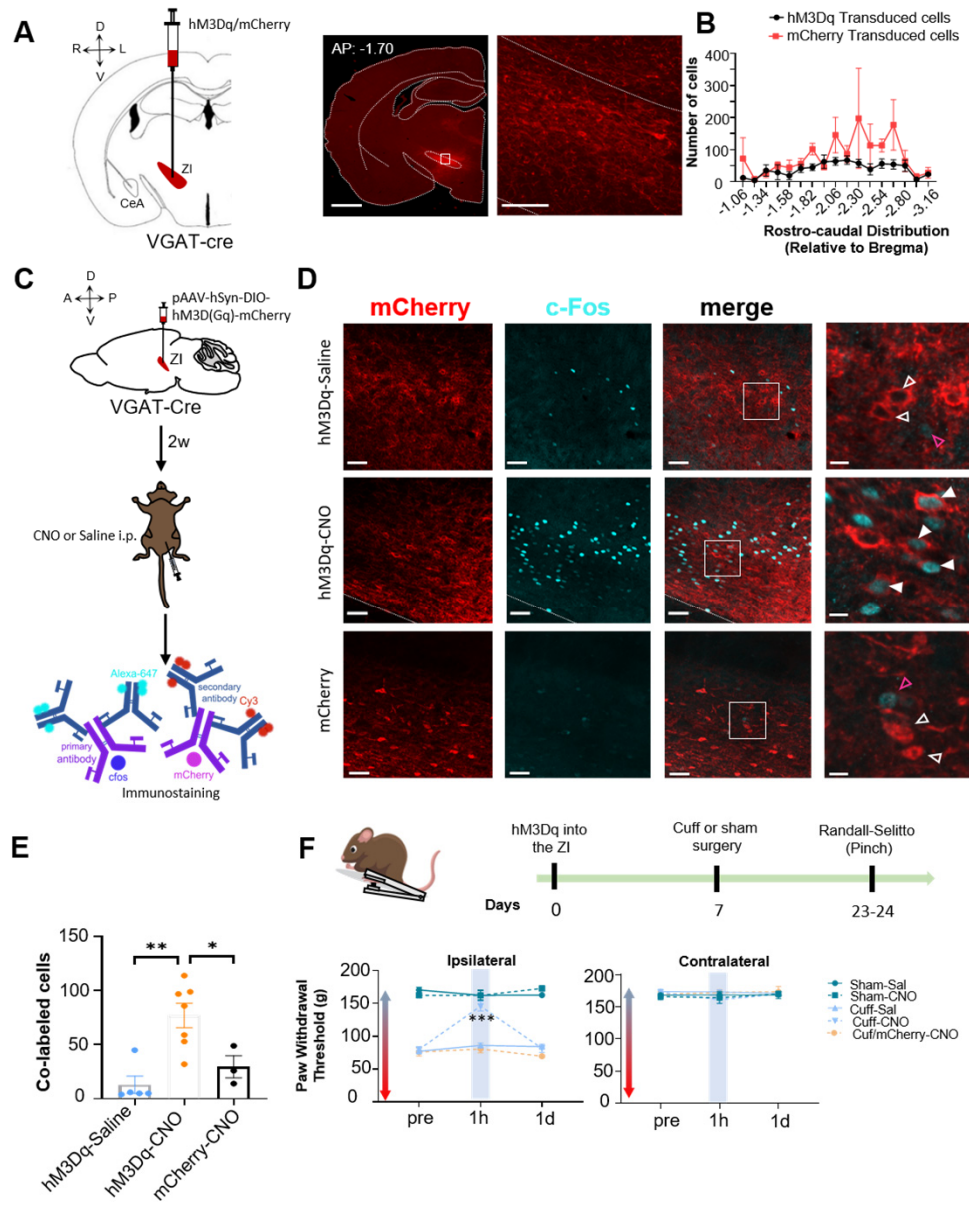

**Figure 6.** Activation of ZI GABAergic cells reverses cuff-induced hypersensitivity to pinch stimulation. **(A)** VGAT-Cre mice were injected with AAV-DIO-hM3Dq-mCherry or AAV-DIO-mCherry into the ZI. Low magnification representative image of a coronal brain slice shows the site of virus injection in red. The area delineated by the white rectangle is shown at higher magnification in the right image. Scale bars are 1000  $\mu$ m for low magnification and 100  $\mu$ m for high magnification images **(B)** Quantification of ZI cells transduced with hM3Dq and mCherry is shown as mean  $\pm$  SEM (n=17 mice for hM3Dq transduced group and 7 mice for mCherry group). **(C)** c-Fos experimental timeline. **(D)** Representative images of coronal brain slices containing the ZI of VGAT-Cre mice injected with AAV-DIO-hM3Dq-mCherry (top and middle panels) or AAV-DIO-mCherry (bottom) into the ZI and i.p. treated with CNO (middle and bottom panels) or saline (top panel). Top panel shows images from mouse with mCherry (Control virus) injected in ZI. mCherry expression is shown in red and immunostaining for c-Fos in cyan. The merged images are shown in the rightmost panels. White boxes delineate the areas magnified on the right panel. Magenta open arrowheads point to cells that are positive for c-Fos only; white open arrowheads point to cells that are positive for mCherry only; solid arrowheads point to cells that are positive for both mCherry and c-Fos. Scale bars are 50  $\mu$ m (low magnification) and 10  $\mu$ m (high magnification). **(E)** Mean  $\pm$  SEM numbers of c-Fos and mCherry transduced co-labeled cells per condition. (n=3-7 mice per condition; \*\*p<0.01, \*p<0.05; One-way ANOVA followed by Tukey's multiple comparisons test). **(F)** Randall Selitto responses are shown as mean  $\pm$  SEM paw withdrawal threshold in the ipsilateral (left panel) and contralateral (right panel) hindpaw before, 1 h and 1 day after CNO or vehicle i.p. injections in cuff or sham mice stereotactically injected with AAV-DIO-hM3Dq-mCherry or AAV-DIO-mCherry into the ZI (n=6-8 mice per condition; \*\*\*p<0.0001 for pre-injections vs 1 h after CNO in cuff-hM3Dq CNO treatment; two-way ANOVA followed by Dunnett's multiple comparisons test). **See Figure 6 – supplemental figures 1 and 2.**

245 activation of VGAT-positive ZI neurons led to significant ( $p < 0.0001$ ) reversal of cuff-  
246 induced hypersensitivity in the hindpaw ipsilateral to cuff implantation, while no  
247 measurable effects were seen in saline-injected or CNO-injected mCherry-control mice.  
248 The effects of activation of VGAT-positive ZI neurons were specific to nerve injury as  
249 withdrawal thresholds in sham treated mice or the hindpaw contralateral to sciatic nerve  
250 cuff were comparable between groups. As illustrated in **Figure 7**, reversal of cuff-induced  
251 hypersensitivity was also modality-specific as behavioral responses to cold and heat  
252 stimulation of the hindpaws were unaffected by chemogenetic activation of VGAT-positive  
253 neurons in the ZI. Taken together, these results demonstrate that activation of VGAT-  
254 positive neurons in the ZI reverses cuff-induced pain hypersensitivity in a modality-  
255 specific manner.

256

## 257 **Discussion**

258 Signals for persistent neuropathic pain in distant parts of the body are perceived  
259 by the brain through ascending pathways, whereas the resulting responses to pain are  
260 heavily influenced by descending pathways from the brain. Maladaptive changes at any  
261 site in the pain neuraxis can result in persistent changes in pain perception. Nerve injury-  
262 induced increases in the activity of CeA-PKC $\delta$  neurons, for example, have been shown  
263 to contribute to behavioral hypersensitivity (Wilson et al., 2019). The neural circuits  
264 involved in modulation of nociceptive behaviors by CeA-PKC $\delta$  cells, however, remains  
265 unknown. In the present study, we identified 17 long-range efferent projections from CeA-  
266 PKC $\delta$  neurons, including the ZI which has been previously reported to be involved in pain  
267 processing. We further demonstrated that the ZI receives strong monosynaptic inhibitory  
268 inputs from CeA-PKC $\delta$  neurons and that chemogenetic manipulation of the activity of

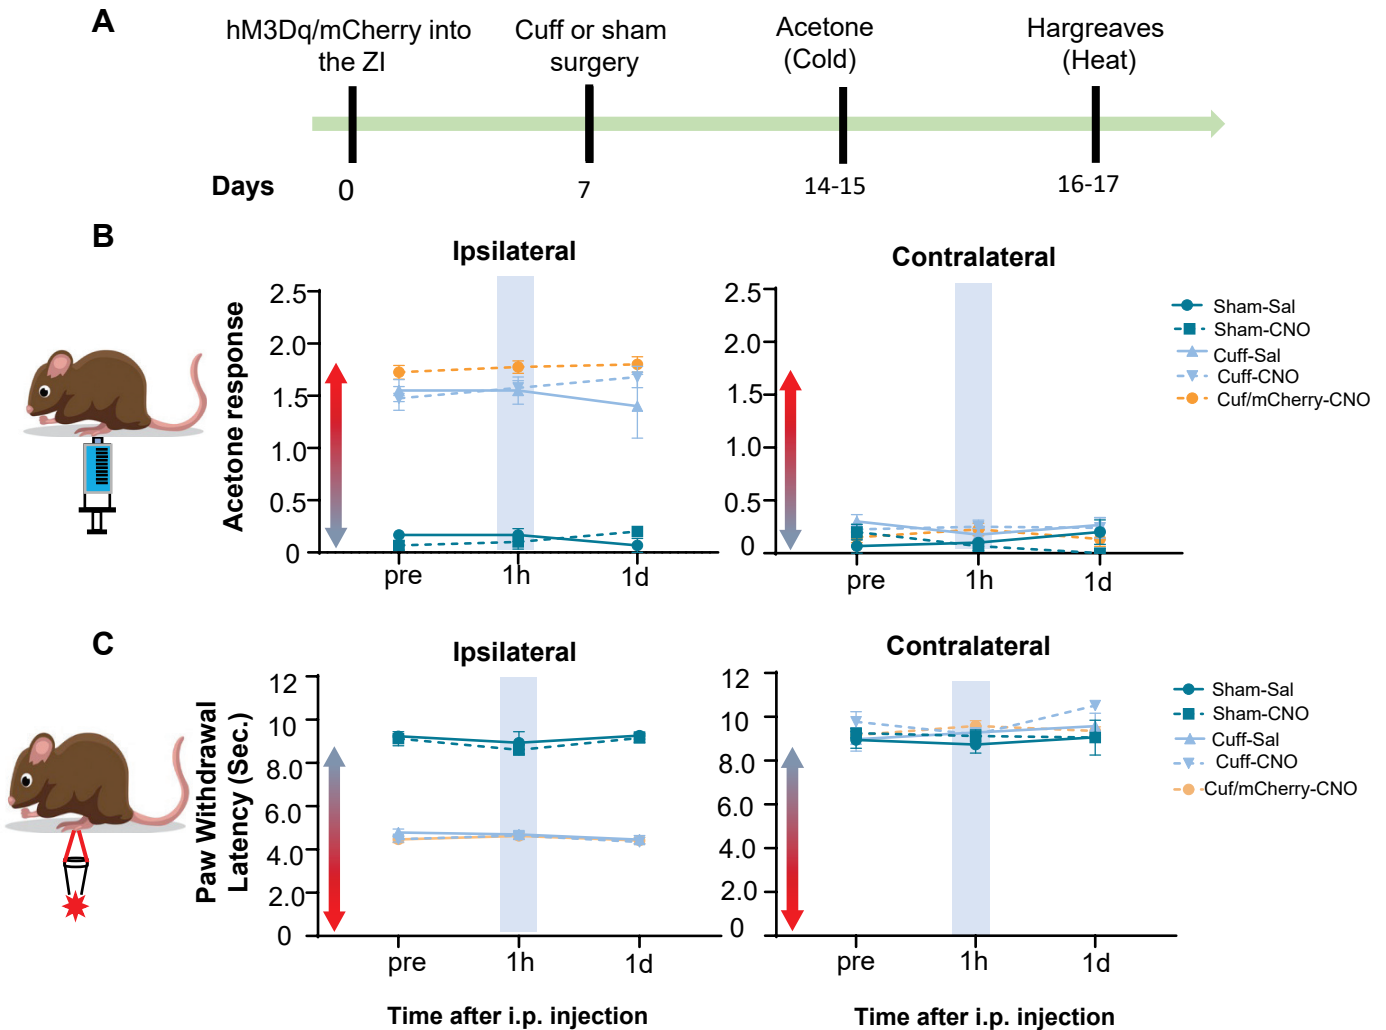

**Figure 7.** Cuff-induced thermal hypersensitivity is unaltered by chemogenetic activation of ZI-VGAT cells. **(A)** Experimental timeline. **(B-C)** Mean  $\pm$  SEM acetone response **(B)** or paw withdrawal latency obtained from Hargreaves test **(C)** in the ipsilateral (left panel) and contralateral (right panel) hindpaw before, 1 h and 1 day after CNO or vehicle i.p. injection in cuff or sham mice stereotaxically injected with AAV-DIO-hM3Dq-mCherry or AAV-DIO-mCherry into the ZI. ( $n=4-8$  mice per treatment; no significant differences were observed in any treatment; two-way ANOVA followed by Dunnett's multiple comparisons test).

269 GABAergic neurons in the ZI bidirectionally modulates pain-related behavioral outputs in  
270 a modality-specific manner. Altogether, our results identify the ZI as a functional  
271 anatomical target of the CeA that contributes to the modulation of pain-related behaviors.

## 272 **Proposed Model**

273 Previous studies have shown that spontaneous firing rates and somatosensory-  
274 evoked neuronal responses decrease in the ZI in a rodent model of central pain  
275 syndrome, subsequently disinhibiting the posterior thalamus (PO) (Masri et al., 2009). In  
276 the CeA, previous studies have demonstrated that CeA-PKC $\delta$  neurons are activated in a  
277 model of neuropathic pain and drive behavioral hypersensitivity (Wilson et al., 2019).  
278 Given the results presented here demonstrating a strong monosynaptic inhibitory input  
279 from the CeA to the ZI (**Figure 3**), in combination with the ZI retrograde tracer experiments  
280 showing high colocalization of retrograde tracer uptake in CeA-PKC $\delta$  neurons (**Figure 2**)  
281 and the behavioral experiments showing that inhibition of ZI GABAergic neurons results  
282 in robust bilateral behavioral hypersensitivity (**Figure 4**), we propose a model where  
283 injury-induced activation of CeA-PKC $\delta$  neurons inhibits ZI-GABAergic cells, subsequently  
284 leading to behavioral hypersensitivity (**Figure 8**).

## 285 **CeA inputs to Zona Incerta**

286 Our optogenetic-assisted circuit mapping experiments showed that both VGAT-  
287 positive and VGAT-negative ZI cells respond to optogenetic stimulation of CeA terminals  
288 in the ZI (**Figure 3**). Similarly, our anatomical experiments show retrograde uptake in both  
289 PKC $\delta$ -positive and PKC $\delta$ -negative cells in the CeA when the retrograde tracer was  
290 injected in the ZI (**Figure 2**). These results are consistent with previous studies that have  
291 shown that somatostatin-expressing neurons in the CeA, which have virtually no overlap

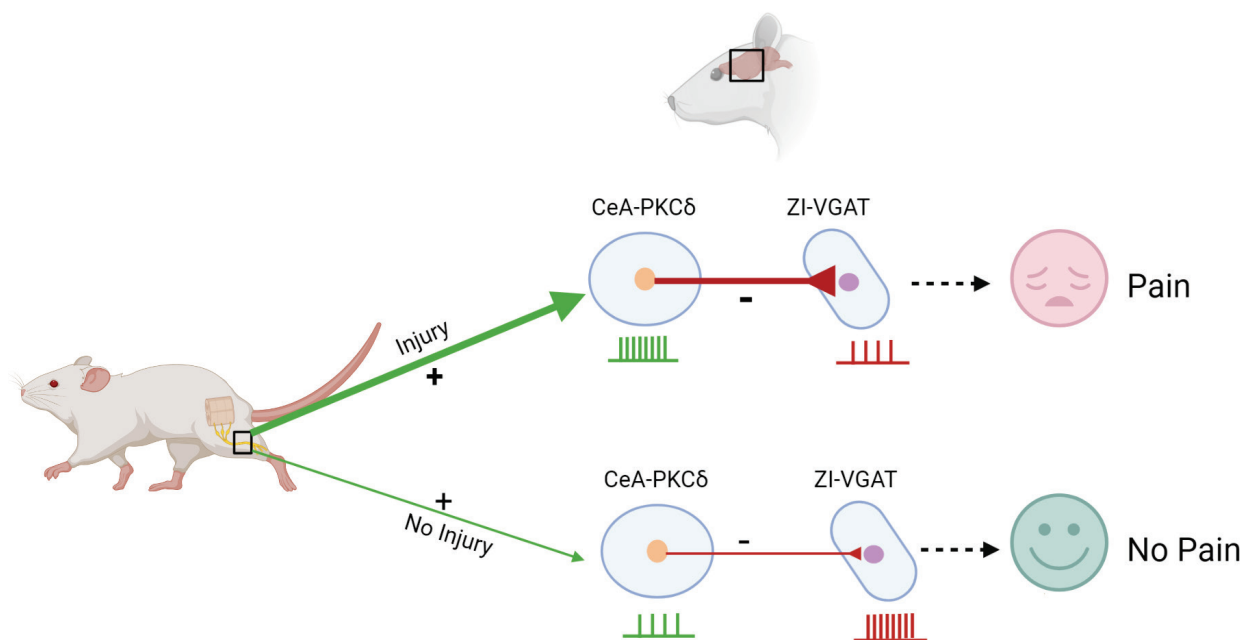

**Figure 8.** Proposed model for modulation of pain-related behaviors in the ZI. Schematic drawing showing ZI-VGAT neurons receive monosynaptic inhibitory inputs from CeA-PKC $\delta$  neurons and modulate pain-related behaviors. After injury, activation of CeA-PKC $\delta$  neurons inhibits ZI-VGAT neurons, subsequently leading to behavioral hypersensitivity.



292 with CeA-PKC $\delta$  neurons, also project to the ZI (Zhou et al., 2018). Interestingly, in this  
293 study, Zhou and colleagues further demonstrated that efferent inputs from somatostatin-  
294 expressing neurons in the CeA selectively target parvalbumin-expressing neurons in the  
295 ZI and contribute to fear memory. Together, these results suggest that genetically distinct  
296 CeA neurons might target neurochemically distinct subpopulations of neurons in the ZI  
297 and that cell-type-specific CeA-ZI pathways might differentially contribute to the  
298 modulation of pain-related behaviors.

### 299 **Modulation of pain-related behaviors in the ZI**

300 In the present study, we show that chemogenetic manipulation of the activity of  
301 VGAT-positive ZI neurons bidirectionally modulate pain-related behaviors in a modality-  
302 specific manner (**Figures 4-7**). Thus, we observe bilateral hypersensitivity to tactile (but  
303 not thermal) stimulation following inhibition of VGAT-positive ZI neurons in the absence  
304 of nerve or tissue injury (**Figures 4-5**). In contrast, chemogenetic activation of VGAT-  
305 positive ZI neurons reversed nerve injury-induced hypersensitivity to pinch (but not  
306 thermal) stimulation. Our results are consistent with previous studies that have shown  
307 that optogenetic activation or inhibition of VGAT-positive ZI neurons influences sensitivity  
308 to tactile stimulation (Hu et al., 2019). Notably, the behavioral effects of chemogenetic  
309 inhibition of the ZI are similar to those observed after chemogenetic activation of the CeA-  
310 PKC $\delta$  neurons, which also results in increases in tactile (but not thermal) sensitivity  
311 (Wilson et al., 2019). Together, these results support our proposed model where injury-  
312 induced activation of CeA-PKC $\delta$  neurons serves as the source of inhibition of ZI,  
313 contributing to behavioral hypersensitivity (**Figure 8**).

314 Interestingly, the behavioral effects of chemogenetic inhibition of CeA-PKC $\delta$   
315 neurons were only partially replicated by the activation of ZI GABAergic neurons. Thus,  
316 while inhibition of CeA-PKC $\delta$  neurons reversed cuff-induced hypersensitivity to tactile,  
317 cold and heat hypersensitivity (Wilson et al., 2019), chemogenetic activation of ZI  
318 GABAergic neurons only reversed cuff-induced pinch, but not cold or thermal,  
319 hypersensitivity (**Figure 6-7**). Previous studies have shown that responses of  
320 spinoparabrachial neurons are modality-specific (Hachisuka et al., 2020). Our results  
321 raise the interesting possibility that subpopulations CeA-PKC $\delta$  neurons might also be  
322 recruited in a modality-specific manner, with CeA-PKC $\delta$  neurons that project to the ZI  
323 selectively responding to tactile but not thermal stimulation.

#### 324 **Inconsistencies with previous studies and potential cell-type-specificity in the ZI**

325 Baseline responses in sham animals or the hindpaw contralateral to sciatic nerve  
326 treatment were unaltered by chemogenetic activation of VGAT-positive ZI neurons in the  
327 present study. This contrasts with previous reports, where optogenetic activation of  
328 VGAT-positive ZI neurons decreased baseline responses to tactile stimulation (Hu et al.,  
329 2019). Previous studies have demonstrated that modulation of behavioral output by  
330 optogenetic stimulation is dependent on the frequency and pattern of the stimulation used  
331 for the experiments (Padilla-Coreano et al., 2019). It is therefore possible that the  
332 differences in the results from our chemogenetic study and the previous optogenetic study  
333 might stem from different levels of neuronal activation by these various techniques.

334 In the present study, we evaluated the functional contribution of VGAT-positive ZI  
335 neurons to the modulation of pain-related behaviors. A separate recent study evaluated  
336 the contribution of a different subpopulation of ZI neurons- those expressing parvalbumin

337 (Wang et al., 2020). Interestingly, this study demonstrated that parvalbumin-positive  
338 neurons in the ZI show an opposite electrophysiological phenotype and function in the  
339 modulation of pain-related behaviors than what we and others observe for the VGAT-  
340 positive ZI neurons. Thus, while the present and previous studies show that inhibition of  
341 VGAT-positive neurons drives behavioral hypersensitivity, activation of parvalbumin-  
342 positive ZI neurons have been previously shown to also promote behavioral  
343 hypersensitivity (Wang et al., 2020). These results are particularly interesting given that  
344 other studies have demonstrated that parvalbumin-positive ZI neurons receive inputs  
345 from somatostatin-expressing CeA neurons (Zhou et al., 2018), which have been  
346 previously shown to be inhibited in the context of pain (Wilson et al., 2019).

347         Based on these combined findings, we propose a model where injury-induced  
348 inhibition of somatostatin-expressing neurons in the CeA disinhibits parvalbumin-positive  
349 ZI neurons, while injury-induced activation of CeA-PKC $\delta$  neurons inhibits VGAT-positive  
350 ZI neurons, both resulting in behavioral hypersensitivity. Whether injury-induced inhibition  
351 of VGAT-positive ZI neurons (by CeA-PKC $\delta$  neurons) occurs simultaneously and under  
352 the same conditions as disinhibition of parvalbumin-positive ZI neurons (by somatostatin-  
353 expressing neurons in the CeA) remains to be determined. Future studies to address  
354 these important questions directly will provide further insights about the CeA-ZI neuronal  
355 connection and the potential cell-type-specific contributions to the modulation of pain-  
356 related behaviors.

357

## 358 **Material and Methods**

### 359 *Animals*

360 All experiments were approved by the Animal Care and Use Committee of the  
361 National Institute of Neurological Disorders and Stroke and the National Institute on  
362 Deafness and other Communication Disorders with the guidelines set by the National  
363 Institutes of Health (NIH). Adult male mice (8 to 17-weeks old) were used for all  
364 experiments. Mice were housed in a vivarium with controlled humidity and temperature  
365 under reversed 12 h light/dark cycle (9 pm to 9 am light) with *ad libitum* access to food  
366 and water. All the behavioral tests were performed during the dark period, between the  
367 hours of 10 am and 6 pm. Mice received 100  $\mu$ l of saline intraperitoneal injection (i.p.)  
368 daily and were handled by the experimenter for one week before the start of behavioral  
369 and electrophysiological experiments following the cupping method as previously  
370 described (Hurst and West, 2010). Following surgeries, mice were housed in pairs and  
371 separated by a perforated Plexiglas divider. Heterozygous male or female *Prkcd*-cre mice  
372 (GENSAT-founder line 011559-UCD) were crossed with Ai9 mice (Jackson Laboratories);  
373 vesicular GABA transporter Cre mice (*Slc32a1*-ires-Cre, or VGAT-Cre mice; Jackson  
374 Laboratories) were bred as homozygous pairs or crossed with Ai9 mice (Jackson  
375 Laboratories). Both the *Prkcd*-cre and VGAT-Cre mouse lines have been previously  
376 validated and shown to express Cre selectively in PKC $\delta$ <sup>+</sup> and GABAergic neurons,  
377 respectively (Vong et al., 2011; Wilson et. al., 2019). The presence of cre-recombinase  
378 in offspring was confirmed by genotyping using DNA extracted from tail biopsies. The  
379 primer sequences (Transnetyx) used for genotyping were  
380 TTAATCCATATTGGCAGAACGAAAACG (forward primer) and  
381 AGGCTAAGTGCCTTCTCTACA (reverse primer).

382 *Stereotaxic Injections in the CeA and ZI*

383 Mice were initially anesthetized with 5% isoflurane in preparation for the  
384 stereotaxic surgery. After induction, mice were head-fixed on a stereotaxic frame (David  
385 Kopf Instruments) and 1.5-2% isoflurane at a flow rate of 0.5 L/min was used for the  
386 duration of surgery. A hand warmer was used for thermal maintenance during the  
387 procedure. Stereotaxic injections were performed using a 32-gauge needle that fits on a  
388 0.5  $\mu$ l volume Hamilton Neuros syringe. All the injections were performed at a flow rate of  
389 0.1  $\mu$ l/min and the syringe was left in place for an additional 5 min after injections to allow  
390 for the diffusion of virus and to prevent backflow.

391 For anterograde labeling, 0.3  $\mu$ l of rAAV8-hSyn-DIO-mCherry (Addgene viral prep  
392 #50459-AAV8) or AAV9-Syn-Flex-ChrimsonR-TdTomato (UNC GTC Vector Core,  
393 AV4384G) was microinjected into the right CeA of *Prkcd*-cre mice. The coordinates  
394 relative to bregma were as follows: AP -1.4 mm, ML + 3.2, DV -4.8 mm. For retrograde  
395 labeling, 0.2  $\mu$ l of Alexa Fluor 647-conjugated cholera toxin subunit B (Invitrogen,  
396 C34778) was stereotaxically injected into the right ZI of *Prkcd*-cre::Ai9 mice. The  
397 coordinates relative to bregma were as follows: AP -1.9 mm, ML -1.4 mm, DV -4.75 mm.  
398 For optogenetic-assisted circuit mapping experiments, 0.3  $\mu$ l of rAAV2-hSyn-  
399 hChR2(H134R)-EYFP-WPRE-PA (UNC GTC Vector Core, AV6556C) was microinjected  
400 into the right CeA of VGAT-Cre::Ai9 mice. The coordinates relative to bregma were as  
401 follows: AP -1.25 mm, ML -3.0 mm, DV -4.5 mm. For chemogenetic experiments, 0.15  $\mu$ l  
402 of pAAV8-hSyn-DIO-hM4D(Gi)-mCherry (Addgene viral prep #44362-AAV8; Krashes et  
403 al., 2011), pAAV8-hSyn-DIO-hM3D(Gq)-mCherry (Addgene viral prep #44361; Krashes  
404 et al., 2011) or rAAV8-hSyn-DIO-mCherry (Addgene viral prep #50459-AAV8) were  
405 microinjected into the right ZI of VGAT-Cre mice. The coordinates relative to bregma were

406 as follows: AP -1.7 mm, ML -1.2 mm, DV -4.7 mm. A minimum of 2 weeks was given  
407 between brain injections and behavior testing to allow for efficient viral-mediated  
408 transduction. For retrograde, anterograde and optogenetic experiments, we waited a  
409 minimum of 4 weeks between the brain injections and the experiments.

#### 410 *Sciatic cuff implantation*

411 Sciatic cuff implantation surgeries were performed 1 week after the brain surgeries  
412 as previously described (Benbouzid et al., 2008). Briefly, mice were anesthetized with 2%  
413 isoflurane at a flow rate of 0.5 L/min. An incision of about 1-cm long was made in the  
414 proximal one third of the lateral left thigh. The sciatic nerve was externalized and stretched  
415 using forceps. For the cuff-implanted group, a polyethylene tubing PE20 (2 mm-long, 0.38  
416 mm ID / 1.09 mm OD; Daigger Scientific) was slid onto the sciatic nerve and was then  
417 placed back in its location. Similarly, for the comparative sham group, mice went through  
418 the same process of sciatic nerve exposure and stretching but no tubing was implanted.  
419 After the procedure was complete, the skin above the thigh was closed with wound clips.  
420 The mice were subjected to at least one-week recovery period before performing the  
421 behavior tests.

#### 422 *Nociceptive Behaviors*

423 Behavioral experiments were done under red light, during the dark phase, and the  
424 experimenter was blind to treatment conditions. Mice were randomized into control and  
425 experimental groups. The timeline for the behavioral experiments relative to AAV brain  
426 injections were as follows: Acetone test: 14-15 days; Hargreaves test: 16-17 days; Von-  
427 Frey test: 20-22 days; Randall-Sellito test: 23-25 days. Each test was performed on 2

428 consecutive days. On each testing day, baseline (pre-injection) measurements were  
429 taken. Saline or Clozapine-N-oxide (CNO, Enzo Life Sciences, Farmingdale, NY) was  
430 injected i.p. (10 mg/kg body weight for hM4Di and 5 mg/kg for hM3Dq experiments) and  
431 a second measurement (post-injection) was taken 45 min to 1 hour after the i.p. injection.  
432 Mice were randomly assigned to saline or CNO on the first day of each test and were  
433 tested on the opposite treatment on the second day of the same test.

#### 434 *Acetone Test*

435 Cold hypersensitivity was assessed by the acetone evaporation test as previously  
436 described (Choi Yoon 1994). Briefly, mice were habituated for at least 2 hours in individual  
437 ventilated opaque white Plexiglas testing chambers (11 x 11 x 13 cm) on an elevated  
438 platform with a floor made of wire mesh. An acetone drop was formed at the top of a 1  
439 mL syringe and gently touched to the center of the plantar surface of the hind paw  
440 ipsilateral or contralateral to sciatic nerve surgery. Nociceptive responses to the acetone  
441 drop were evaluated for 60 seconds using a modified 0-2-point system developed by  
442 Colburn et al., 2007. According to this scoring system, 0 = rapid, transient lifting, licking,  
443 or shaking of the hind paw, which subsides immediately; 1 = lifting, licking, and/or shaking  
444 of the hind paw, which continues beyond the initial application, but subsides within 5 s; 2  
445 = protracted, repeated lifting, licking, and/or shaking of the hind paw. Five trials were  
446 performed with ~5 min between-trial intervals. Data is represented as an average score  
447 of 5 stimulations from each hindpaw before, 1 hour and 1 day after drug treatment (CNO  
448 or vehicle).

#### 449 *Hargreaves test*



450 To evaluate heat hypersensitivity, we used a modified version of the Hargreaves  
451 Method (Hargreaves et. al., 1988) as previously described (Wilson et.al., 2019). On the  
452 experiment day, mice were habituated prior to testing for at least 1 hour in individual  
453 ventilated opaque white plexiglass testing chambers (11 x 11 x 13 cm) placed on an  
454 elevated glass floor maintained at 30°C. Following habituation, a noxious radiant heat  
455 beam was applied through the glass floor (IITC Life Sciences, Woodland Hills, CA) to the  
456 center of the plantar surface of the hindpaw (ipsilateral or contralateral to sciatic nerve  
457 surgery), until the mouse showed a withdrawal response. A cutoff of 15 seconds latency  
458 and 25 active intensity was used in each trial to prevent skin lesions. At least 3 minutes  
459 were allowed between consecutive trials. The average of five trials was calculated and  
460 used as the threshold for each hindpaw.

#### 461 *Von Frey*

462 Mechanical hypersensitivity was assessed as the paw withdrawal threshold in  
463 response to von Frey filaments (North Coast Medical, Inc. San Jose, CA), as previously  
464 described (Wilson et. al., 2019). On each testing day, mice were placed individually in  
465 ventilated opaque white Plexiglas testing chambers (11 x 11 x 13 cm) on an elevated  
466 mesh platform at least 2 hours before application of stimulus. Mesh floor allowed full  
467 access to the paws from below. After the acclimation period, each von Frey filament was  
468 applied to the center of the plantar surface of the hindpaw (ipsilateral or contralateral to  
469 sciatic nerve surgery) for 2-3 seconds, with enough force to cause slight bending against  
470 the paw. This procedure continued for a total of five measurements. The smallest filament  
471 that evoked a paw withdrawal response in at least three of five measurements was taken

472 as the mechanical threshold for that trial. The average of five trials was calculated and  
473 used as the threshold value per hindpaw.

#### 474 *Randall Selitto Test*

475 The Randall Selitto test was performed to assess the response thresholds to  
476 mechanical pressure stimulation (pinch) of the hind paws (Randall and Selitto, 1957) in  
477 lightly anesthetized animals. Briefly, mice were anesthetized in 5% isoflurane in an  
478 induction chamber. Subsequently, animals were kept under light anesthesia with 0.5%–  
479 1% isoflurane at a flow rate of 0.5 L/min. A pinch stimulation of less than 200 g of force  
480 was delivered to the plantar surface of the hindpaw ipsilateral or contralateral to sciatic  
481 nerve treatment. Pinch pressure stimulation was applied at approximately 1-minute  
482 intervals for 30 minutes. The pressure that triggered withdrawal of paw was recorded in  
483 all trials. The data is represented as the average response for all trials for each animal  
484 before, 1 hour and 1 day after drug treatment (CNO or vehicle).

#### 485 *Slice Electrophysiology*

486 Acute coronal ZI slices were prepared from brains of VGAT-Cre or VGAT-Cre::Ai9  
487 mice (12-to 18-week-old) 2-3 weeks after stereotaxic injection of AAV8-hSyn-DIO-hM4Di-  
488 mCherry into the ZI or 5-8 weeks after AAV2-hsyn-hChr2(H134R)-EYFP injection into  
489 the CeA. Briefly, mice were deeply anesthetized with 1.25% Avertin anesthesia (2,2,2-  
490 tribromoethanol and tert-amyl alcohol in 0.9% NaCl; 0.025 ml/g body weight), sacrificed  
491 by cervical dislocation and decapitated. The brains were rapidly removed and placed in  
492 an ice-cold cutting solution containing (in mM): 110.0 choline chloride, 25.0 NaHCO<sub>3</sub>, 1.25  
493 NaH<sub>2</sub>PO<sub>4</sub>, 2.5 KCl, 0.5 CaCl<sub>2</sub>, 7.2 MgCl<sub>2</sub>, 25 D-glucose, 12.7 L-ascorbic acid, 3.1 pyruvic

494 acid, and saturated with 95% O<sub>2</sub>-5% CO<sub>2</sub>. Coronal slices (300 μm) containing the ZI were  
495 cut on a Leica VT1200 S vibrating blade microtome (Leica Microsystems Inc., Buffalo  
496 Grove, IL, USA) and incubated in a holding chamber with oxygenated artificial cerebral  
497 spinal fluid (ACSF) containing (in mM): 125 NaCl, 2.5 KCl, 1.25 NaH<sub>2</sub>PO<sub>4</sub>, 25 NaHCO<sub>3</sub>,  
498 2.0 CaCl<sub>2</sub>, 1.0 MgCl<sub>2</sub>, 25 D-glucose (~310 mOsm) saturated with 95% O<sub>2</sub>- 5% CO<sub>2</sub>, at 33°  
499 C for 30 minutes, then moved to room temperature for at least an additional 20 minutes  
500 before transfer to the recording chamber.

501 To validate the effects of CNO on hM4Di-transduced cells in the ZI, current-clamp  
502 recordings using potassium methylsulfate-based internal solution (in mM: 120 KMeSO<sub>4</sub>,  
503 20 KCl, 10 HEPES, 0.2 EGTA, 8 NaCl, 4 Mg-ATP, 0.3 Tris-GTP, 14 Phosphocreatine, pH  
504 7.3 with KOH (~300 mosmol<sup>-1</sup>) were used to assess changes in excitability. Whole-cell  
505 current-clamp recordings were obtained at 33 ± 1° C from ZI cells expressing mCherry. A  
506 recording chamber heater and an in-line solution heater (Warner Instruments) were used  
507 to control and monitor the bath temperature throughout the experiment. Cells were  
508 visually identified using an upright microscope (Nikon Eclipse FN1) equipped with  
509 differential interference contrast optics with infrared illumination and fluorescent  
510 microscopy. Spontaneously active cells were injected with hyperpolarizing current (-10 to  
511 -50 pA) to bring their membrane potentials to between -80 and -70 mV. A 500 ms  
512 depolarizing current (10 to 120 pA) was injected to elicit between 2 and 5 action potentials.  
513 The current injection repeated every 15 seconds until the cell fired stably and consistently.  
514 Following this stabilization, 10 additional recordings were acquired before bath application  
515 of either 10 μM CNO or vehicle in ACSF. Recordings of the same current injection were  
516 continued every 15 seconds for approximately 5 minutes, until the cell fired consistently

517 and stably. Ten additional recordings were performed. The number of action potentials  
518 elicited during each depolarizing current injection were used to assess excitability. Values  
519 for before and after CNO or vehicle application were averaged across five traces and  
520 compared. Current clamp signals were acquired at 100 kHz and filtered at 10 kHz.

### 521 *Optogenetically assisted Circuit Mapping*

522 For the optogenetically assisted circuit mapping experiments, recordings were  
523 done using a cesium gluconate-based internal solution containing (in mM): 120 cesium  
524 gluconate, 6 NaCl, 10 HEPES, 12 phosphocreatine, 5 EGTA, 1 CaCl<sub>2</sub>, 2 MgCl<sub>2</sub>, 2 ATP,  
525 and 0.5 GTP, pH 7.4 adjusted with CsOH (~290 mOsm). Whole-cell voltage-clamp  
526 recordings were obtained at 33 ± 1° C from visually identified tdTomato-expressing and  
527 non-expressing ZI neurons using differential interference contrast optics with infrared  
528 illumination and fluorescence microscopy. Optically evoked inhibitory postsynaptic  
529 currents (oIPSCs) were recorded at a holding potential of 0 mV in the presence of TTX  
530 (1 μM) and 4-AP (100 μM). Blue LED light (λ = 470 nm, Mightex) paired pulses of 5 ms  
531 duration with an interval of 200 ms between pulses were delivered at 10 Hz to drive paired  
532 synaptic responses. Paired pulse ratios (PPR) were determined by the ratio of the  
533 amplitude of the peak evoked by the second pulse divided by the amplitude of the peak  
534 evoked by the first pulse. Signals were acquired at 100 kHz and filtered at 10kHz.

### 535 *Immunohistochemistry*

536 At the end of each experiment, mice were deeply anesthetized with 1.25% Avertin  
537 anesthesia (2,2,2-tribromoethanol and tert-amyl alcohol in 0.9% NaCl; 0.025 ml/g body  
538 weight) i.p., then perfused transcardially with 0.9% NaCl (37°C), followed by 100 mL of  
539 ice-cold 4% paraformaldehyde in phosphate buffer solution (PFA/PB). The brain was

540 dissected and post fixed in 4% PFA/PB overnight at 4°C. After cryoprotection in 30%  
541 sucrose/PB for 48 h, coronal sections (30-45 µm) were obtained using a freezing sliding  
542 microtome and stored in 0.1 M Phosphate Buffered Saline (PBS), pH 7.4 containing  
543 0.01% sodium azide (Sigma) at 4°C until immunostaining. Sections were rinsed in PBS,  
544 incubated in 0.1% Triton X-100 in PBS for 10 minutes at room temperature and blocked  
545 in 5% normal goat serum (NGS) (Vector Labs, Burlingame, CA) with 0.1% Triton X-100,  
546 0.05% Tween-20 and 1% bovine serum albumin (BSA) for 30 minutes at room  
547 temperature. Sections were then incubated for 72 h at 4°C in mouse anti-PKCδ (1:1000,  
548 BD Biosciences, 610397), rabbit anti-Phospho-c-Fos (1:2000, Cell Signaling Technology,  
549 5348) or rat anti-mCherry (1:500, Invitrogen, M11217) in 1.5% NGS blocking solution with  
550 0.1% Triton X-100, 0.05% Tween-20 and 1% BSA. Sections were then rinsed in PBS and  
551 incubated in Alexa Fluor 647-conjugated goat anti-mouse (1:100, Invitrogen, A21235),  
552 Alexa Fluor 647-conjugated goat anti-rabbit (1:250, Invitrogen, A21244), or goat anti rat  
553 Cy3 (1:250, Invitrogen, A10522) secondary antibodies in 1.5% NGS blocking solution with  
554 0.1% Triton X-100, 0.05% Tween 20 and 1% BSA, protected from light, for 2 h at room  
555 temperature. Sections were then rinsed in PBS, mounted on positively charged glass  
556 slides, air-dried and coverslips were placed using Fluoromount-G (Southern Biotech).

557 For the c-Fos experiments, VGAT-Cre mice received CNO (5 mg/kg) or saline  
558 injections (i.p) 2 weeks post virus injection into the ZI. Mice were housed in their home  
559 cages for 1 hour prior to transcardial perfusion, brain dissection and tissue processing.  
560 For the mapping of axonal terminals from CeA-PKCδ neurons, PKCδ-cre mice injected  
561 with AAV9-Syn-Flex-ChrimsonR-TdTomato or AAV8-hSyn-DIO-mCherry were  
562 transcardially perfused at least 4 weeks after the brain injections. For the mCherry-

563 injected brains, 30  $\mu$ m coronal sections from the entire brain were collected and  
564 immunostained for mCherry as described above. No staining was performed for the  
565 Chrimson-R-injected brains.

### 566 *Imaging and analysis*

567 For confocal studies, images were acquired using a Nikon A1R laser scanning  
568 confocal microscope. 2X (for low magnification), 20X (for high magnification) or 40X (oil-  
569 immersion for higher magnification) objectives were used. The experimental conditions  
570 for image collection including laser intensity, gain, and pinhole were identical for  
571 experiments. Multiple channels (GFP, RFP and CY5) were used for sequential image  
572 acquisition where Z stacks data collection was done at 0.9  $\mu$ m. Following acquisition,  
573 images were consolidated using NIS Elements software with automatic stitching of  
574 subsequent images, and conversion of stacks into maximum intensity z-projections.  
575 Quantitative analysis of CeA and ZI imaging data was performed between bregma -0.82  
576 and -1.82 and bregma -1.06 and -2.54, for CeA and ZI, respectively. Anatomical limits of  
577 each region were identified based on the mouse brain atlas (Paxinos and Franklin, 2001).  
578 Number of positive cells were quantified manually for each channel using NIS Elements  
579 software using one section per rostro caudal level for each mouse. Co-labeled cells were  
580 identified by NIS Elements software automatically and were further visually corroborated  
581 by an experimenter.

582 For the mapping of axonal terminals from CeA-PKC $\delta$  neurons, coronal slices from  
583 the entire brain of PKC $\delta$ -cre mice injected with AAV9-Syn-Flex-ChrimsonR-TdTomato or  
584 AAV8-hSyn-DIO-mCherry, collected and immunostained 120  $\mu$ m apart from each other,  
585 were visually inspected for the presence of fluorescent axonal terminals using a 20X

586 objective in a Nikon A1R laser scanning confocal microscope. Classic morphological  
587 criteria, defined as the presence of varicosities and the thickness and organization pattern  
588 of the signal, was used to distinguish labeled terminals (very thin fibers with numerous  
589 ramifications and varicosities) from fibers of passage (thicker fibers without ramifications  
590 and varicosities) as previously described (Bernard et al.,1993). Low and high  
591 magnification images of all the brain sections containing terminals were acquired and the  
592 anatomical localization of the terminals was then determined using a Mouse Brain Atlas  
593 (Paxinos and Franklin, 2001) Representative images of terminals were collected using a  
594 40X oil-immersion objective.

595         Semi-quantitative analysis of the areas containing axonal terminals was done  
596 based on the density of terminals observed and are reported as sparse (+), moderate  
597 (++) and dense (+++) in the defined area. A similar analysis was also performed with the  
598 brain of experiment 265945645 of the Mouse Brain Connectivity Atlas of the Allen Brain  
599 Institute (<http://connectivity.brain-map.org/>). This brain was identified using the Source  
600 Search tool on the Mouse Brain Connectivity Atlas website and filtering for the CeA as  
601 the brain region and *Prkcd*-GluCla-CFP-IRES-Cre as the mouse line of interest. The  
602 tracer injected is described as EGFP; the stereotaxic coordinates for the injection were  
603 AP -1.82 mm, ML -2.65 mm, DV -4.25 mm and the injection volume was 0.02 mm<sup>3</sup>.

#### 604 *Statistical Analysis*

605         Data are presented as mean  $\pm$  SEM. Statistical analyses was conducted using  
606 GraphPad Prism (v8.0). Unpaired/paired two-tailed t-test, Wilcoxon two-tailed matched  
607 pair signed rank test, one-way analyses of variance (ANOVA) followed by Tukey's  
608 multiple comparison test and two-way ANOVA followed by Dunnett's multiple comparison

609 test were used. The significance level was set at  $p < 0.5$ . Sample sizes and p values are  
610 indicated in figure legends. Detailed information on each statistical test performed are  
611 shown in **Supplemental Table 1**.

612

## 613 **Acknowledgements**

614 This research was supported by the National Center for Complementary and  
615 Integrative Health Intramural Research Program. The authors would like to thank Simón  
616 Arango, Adela Francis Malavé and Jeitzel Torres Rodriguez for their assistance in  
617 histological and anatomical experiments. pAAV-hSyn-DIO-hM3D(Gq)-mCherry (Addgene  
618 viral prep # 44361-AAV8), pAAV-hSyn-DIO-hM4D(Gi)-mCherry (Addgene viral prep #  
619 44362-AAV8), and pAAV-hSyn-DIO-mCherry (Addgene viral prep # 50459-AAV8) were  
620 a gift from Bryan Roth. The AAV2-hsyn-hChR2(H134R)-EYFP was provided by the  
621 Vector Core at the University of North Carolina, with a material transfer agreement with  
622 Professor Karl Deisseroth (Stanford University).

623

624 **Competing Interests:** The authors declare no conflict of interests.

625

## 626 **References:**

627 1. Dworkin RH. An overview of neuropathic pain: syndromes, symptoms, signs, and several  
628 mechanisms. *Clin J Pain*. 2002;18(6):343-349. [10.1097/00002508-200211000-00001](https://doi.org/10.1097/00002508-200211000-00001).

629 2. Treede RD, Jensen TS, Campbell, J.N. Cruccu, G. Dostrovsky, J.O. Griffin, J.W. Hansson, P.  
630 Hughes, R. Nurmikko, T. Serra, J. Neuropathic pain: redefinition and a grading system for clinical  
631 and research purposes. *Neurology*. 2008;70(18):1630-  
632 1635. [10.1212/01.wnl.0000282763.29778.59](https://doi.org/10.1212/01.wnl.0000282763.29778.59).

633 3. Bernard JF, Besson, JM. The spino(trigemino)pontoamygdaloid pathway: electrophysiological  
634 evidence for an involvement in pain processes. *J Neurophysiol*. 1990;63(3):473-  
635 490. [10.1152/jn.1990.63.3.473](https://doi.org/10.1152/jn.1990.63.3.473).



- 636 4. Carrasquillo Y, Gereau RW 4th. Activation of the extracellular signal-regulated kinase in the  
637 amygdala modulates pain perception. *J Neurosci.* 2007;27(7):1543-  
638 155110.1523/JNEUROSCI.3536-06.2007.
- 639 5. Bushnell MC, Ceko M, Low LA. Cognitive and emotional control of pain and its disruption in  
640 chronic pain. *Nat Rev Neurosci.* 2013;14(7):502-51110.1038/nrn3516.
- 641 6. Neugebauer V, Li W, Bird GC, Han JS. The amygdala and persistent pain. *Neuroscientist.*  
642 2004;10(3):221-23410.1177/1073858403261077.
- 643 7. Zald DH. The human amygdala and the emotional evaluation of sensory stimuli. *Brain*  
644 *Research Reviews* 2003;41:88–123.10.1016/s0165-0173(02)00248-5.
- 645 8. Wilson TD, Valdivia S, Khan A, Ahn HS, Adke AP, Martinez Gonzalez S, Sugimura YK,  
646 Carrasquillo Y. Dual and Opposing Functions of the Central Amygdala in the Modulation of Pain.  
647 *Cell Rep.* 2019;29(2):332-346 e33510.1016/j.celrep.2019.09.011.
- 648 9. Ricardo JA. Efferent connections of the subthalamic region in the rat. II. The zona incerta. *Brain*  
649 *Research.* 1981;214(1):43-6010.1016/0006-8993(81)90437-6.
- 650 10. Mitrofanis J. Some certainty for the "zone of uncertainty"? Exploring the function of the zona  
651 incerta. *Neuroscience.* 2005;130(1):1-1510.1016/j.neuroscience.2004.08.017.
- 652 11. Zhou M, Liu Z, Melin MD, Ng YH, Xu W, Sudhof TC. A central amygdala to zona incerta  
653 projection is required for acquisition and remote recall of conditioned fear memory. *Nat Neurosci.*  
654 2018;21(11):1515-151910.1038/s41593-018-0248-4.
- 655 12. Zhang X, Van Den Pol A. Rapid binge-like eating and body weight gain driven by zona incerta  
656 GABA neuron activation. *Science.* 2017;356(6340):853–85910.1126/science.aam7100.
- 657 13. Chou XL, Wang X, Zhang ZG, Shen L, Zingg B, Huang J, Zhong W, Mesik L, Zhang LI, Tao  
658 HW. Inhibitory gain modulation of defense behaviors by zona incerta. *Nat Commun.*  
659 2018;9(1):115110.1038/s41467-018-03581-6.
- 660 14. Zhao ZD, Chen Z, Xiang X, Hu M, Xie H, Jia X, Cai F, Cui Y, Chen Z, Qian L, Liu J, Shang C,  
661 Yang Y, Ni X, Sun W, Hu J, Cao P, Li H, Shen WL. Zona incerta GABAergic neurons integrate  
662 prey-related sensory signals and induce an appetitive drive to promote hunting. *Nat Neurosci.*  
663 2019;22(6):921-93210.1038/s41593-019-0404-5.
- 664 15. Masri R, Quilton RL, Lucas JM, Murray PD, Thompson SM, Keller A. Zona incerta: a role in  
665 central pain. *J Neurophysiol.* 2009;102(1):181-19110.1152/jn.00152.2009.
- 666 16. Wang H, Dong P, He C, Feng XY, Huang Y, Yang WW, Gao HJ, Shen XF, Lin S, Cao SX,  
667 Lian H, Chen J, Yan M, Li XM. Incerta-thalamic Circuit Controls Nocifensive Behavior via  
668 Cannabinoid Type 1 Receptors. *Neuron.* 2020;107(3):538-551  
669 e53710.1016/j.neuron.2020.04.027.
- 670 17. Petronilho A, Reis GM, Dias QM, Fais RS, Prado WA. Antinociceptive effect of stimulating the  
671 zona incerta with glutamate in rats. *Pharmacol Biochem Behav.* 2012;101(3):360-  
672 36810.1016/j.pbb.2012.01.022.

- 673 18. Moon HC, Park YS. Reduced GABAergic neuronal activity in zona incerta causes neuropathic  
674 pain in a rat sciatic nerve chronic constriction injury model. *J Pain Res.* 2017;10:1125-  
675 113410.2147/JPR.S131104.
- 676 19. Hu TT, Wang RR, Du Y, Guo F, Wu YX, Wang Y, Wang S, Li XY, Zhang SH, Chen Z.  
677 Activation of the Intrinsic Pain Inhibitory Circuit from the Midcingulate Cg2 to Zona Incerta  
678 Alleviates Neuropathic Pain. *J Neurosci.* 2019;39(46):9130-914410.1523/JNEUROSCI.1683-  
679 19.2019.
- 680 20. Moon HC, Lee YJ, Cho CB, Park YS. Suppressed GABAergic signaling in the zona incerta  
681 causes neuropathic pain in a thoracic hemisection spinal cord injury rat model. *Neurosci Lett.*  
682 2016;632:55-6110.1016/j.neulet.2016.08.035.
- 683 21. Hurst JL, West RS. Taming anxiety in laboratory mice. *Nat Methods.* 2010;7(10):825-  
684 82610.1038/nmeth.1500.
- 685 22. Vong L, Ye C, Yang Z, Choi B, Chua S, Jr., Lowell BB. Leptin action on GABAergic  
686 neurons prevents obesity and reduces inhibitory tone to POMC neurons. *Neuron.*  
687 2011;71(1):142-15410.1016/j.neuron.2011.05.028.  
688
- 689 23. Krashes MJ, Koda S, Ye C, Rogan SC, Adams AC, Cusher DS, Maratos-Flier E, Roth BL,  
690 Lowell BB. Rapid, reversible activation of AgRP neurons drives feeding behavior in mice. *J Clin*  
691 *Invest.* 2011;121(4):1424-142810.1172/JCI46229.
- 692 24. Benbouzid M, Pallage V, Rajalu M, Waltisperger E, Doridot S, Poisbeau P, Freund-Mercier  
693 MJ, Barrot M. Sciatic nerve cuffing in mice: a model of sustained neuropathic pain. *Eur J Pain.*  
694 2008;12(5):591-59910.1016/j.ejpain.2007.10.002.
- 695 25. Choi Y, Wook Y, Yoon, Na Heung Sik, Kim Sun Ho, Chung Jin Mo. Behavioral signs of  
696 ongoing pain and cold allodynia in a rat model of neuropathic pain. *Pain.* 1994;59(3):369-  
697 37610.1016/0304-3959(94)90023-X.
- 698 26. Colburn RW, Lubin ML, Stone DJ, Jr, Wang Y, Lawrence D, D'Andrea MR, Brandt MR, Liu Y,  
699 Flores CM, Qin N. Attenuated cold sensitivity in TRPM8 null mice. *Neuron.* 2007;54:379–386.  
700 10.1016/j.neuron.2007.04.017.
- 701 27. Hargreaves K, Dubner R, Brown F, Flores C, Joris J. A new and sensitive method for  
702 measuring thermal nociception in cutaneous hyperalgesia. *Pain.* 1988;32:77-8810.1016/0304-  
703 3959(88)90026-7.
- 704 28. RANDALL LO, SELITTO JJ. A method for measurement of analgesic activity on inflamed  
705 tissue. *Arch Int Pharmacodyn Ther.* 1957;111(4):409-419,
- 706 29. Paxinos G, Franklin, K.B.J. *The Mouse Brain in Stereotaxic Coordinates.*: Academic Press;  
707 2001.
- 708 30. Bernard JF, Alden. M., Besson, J.M. The Organization of the Efferent Projections From the  
709 Pontine Parabrachial Area to the Amygdaloid Complex: A Phaseolus vulgaris Leucoagglutinin  
710 (PHA-L) Study in the Rat. *J Comp Neurol.* 1993;329(2):201-22910.1002/cne.903290205.

- 711 31. Reardon F, Mitrofanis J. Organisation of the amygdalo-thalamic pathways in rats. *Anat*  
712 *Embryol (Berl)*. 2000;201:75–84. [10.1007/pl00008229](https://doi.org/10.1007/pl00008229).
- 713 32. Barbier M, Chometton S, Peterschmitt Y, Fellmann D, Risold PY. Parasubthalamic and  
714 calbindin nuclei in the posterior lateral hypothalamus are the major hypothalamic targets for  
715 projections from the central and anterior basomedial nuclei of the amygdala. *Brain Struct Funct*.  
716 2017;222(7):2961-2991. [10.1007/s00429-017-1379-1](https://doi.org/10.1007/s00429-017-1379-1).
- 717 33. Shinonaga YT, Mizuno N. Direct projections from the central amygdaloid nucleus to the  
718 globus pallidus and substantia nigra in the cat. *Neuroscience*. 1992;51(3):4522-4529. [10.1016/0306-4522\(92\)90308-O](https://doi.org/10.1016/0306-4522(92)90308-O).
- 720 34. Aggleton PJ. *The Amygdala A Functional Analysis Second Edition*: Oxford University Press;  
721 2nd edition; 2000. 712 p, 21 December 2000.
- 722 35. Hachisuka J, Koerber HR, Ross SE. Selective-cold output through a distinct subset of lamina  
723 I spinoparabrachial neurons. *Pain*. 2020;161(1):185-194. [10.1097/j.pain.0000000000001710](https://doi.org/10.1097/j.pain.0000000000001710).
- 724 36. Padilla-Coreano N, Canetta S, Mikofsky RM, Alway E, Passecker J, Myroshnychenko MV,  
725 Garcia-Garcia AL, Warren R, Teboul E, Blackman DR, Morton MP, Hupalo S, Tye KM, Kellendonk  
726 C, Kupferschmidt DA, Gordon JA. Hippocampal-Prefrontal Theta Transmission Regulates  
727 Avoidance Behavior. *Neuron*. 2019;104(3):601-610. [10.1016/j.neuron.2019.08.006](https://doi.org/10.1016/j.neuron.2019.08.006).

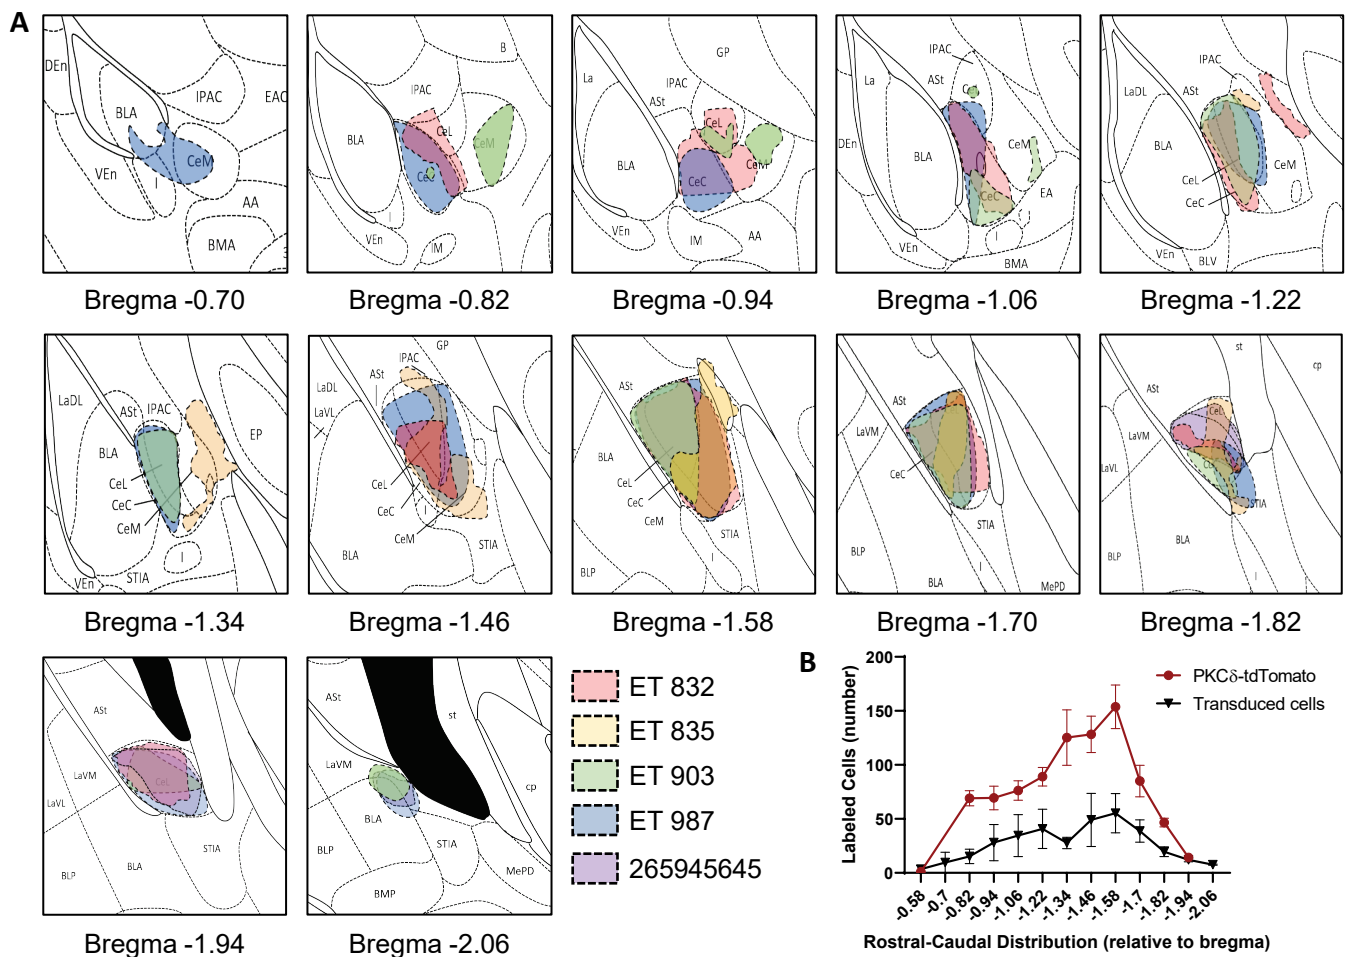

**Figure 1 – figure supplement 1. (A)** Rostro-caudal distribution of AAV8-hSyn-DIO-mCherry or AAV1-Syn-Flex-ChrimsonR-tdTomato injection sites in mice used for anatomical analysis. Drawings of injection sites throughout *Prkcd*-Cre mice brains injected into the CeA with AAV8-hSyn-DIO-mCherry (ET 832 and ET835), AAV1-Syn-Flex-ChrimsonR-tdTomato (ET 903 and ET 987) or EGFP (experiment 265945645 of the Mouse Brain Connectivity Atlas of the Allen Brain Institute- <http://connectivity.brain-map.org/>). Individual mice are represented in different colors. **(B)** Mean  $\pm$  SEM number of neurons transduced with Chrimson-R-tdTomato or mCherry and PKC $\delta$ -tdTomato labeled cells in the CeA as a function of rostro-caudal level relative to bregma (n=4 mice for transduced neurons; n=5 mice for PKC $\delta$ -tdTomato neurons).

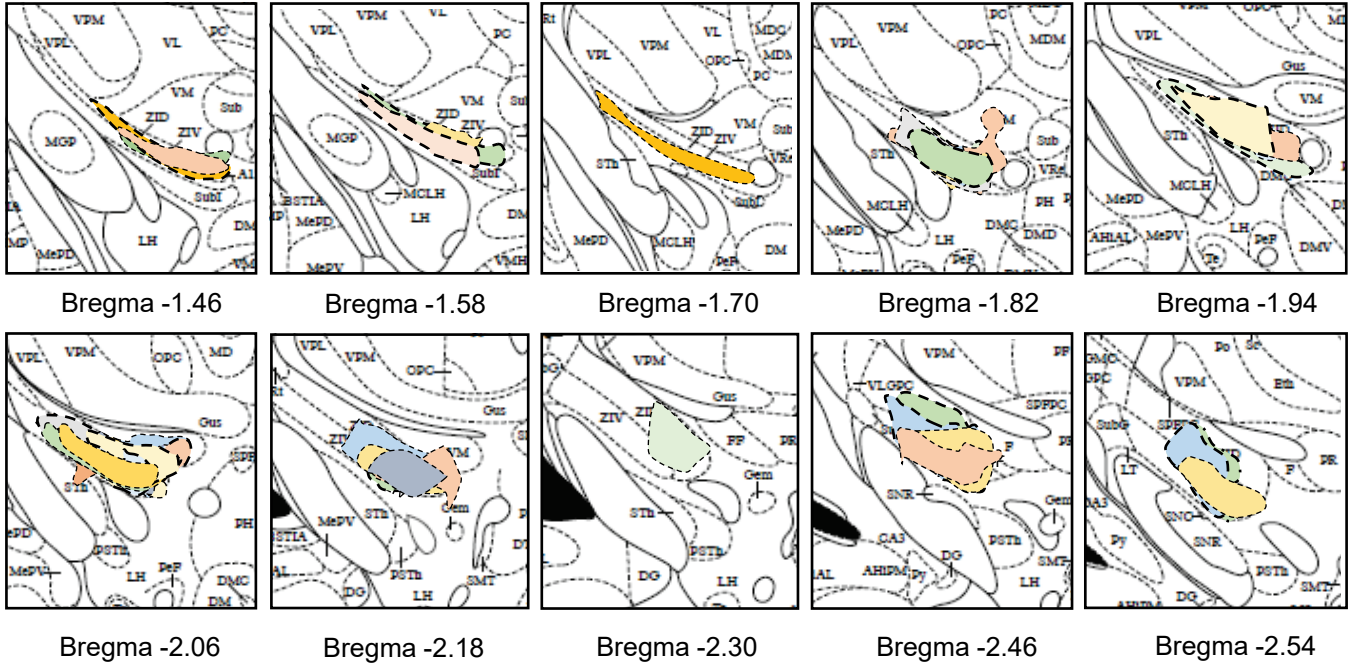

**Figure 4 – figure supplement 1.** Rostro-caudal distribution AAV-hSyn-DIO-hM4D(Gi)-mCherry injection sites in mice used for behavioral experiments. Drawings of injection sites throughout the VGAT-Cre mice brains injected with AAV-hSyn-DIO-hM4D(Gi)-mCherry into the ZI. Individual mice are represented in different color.



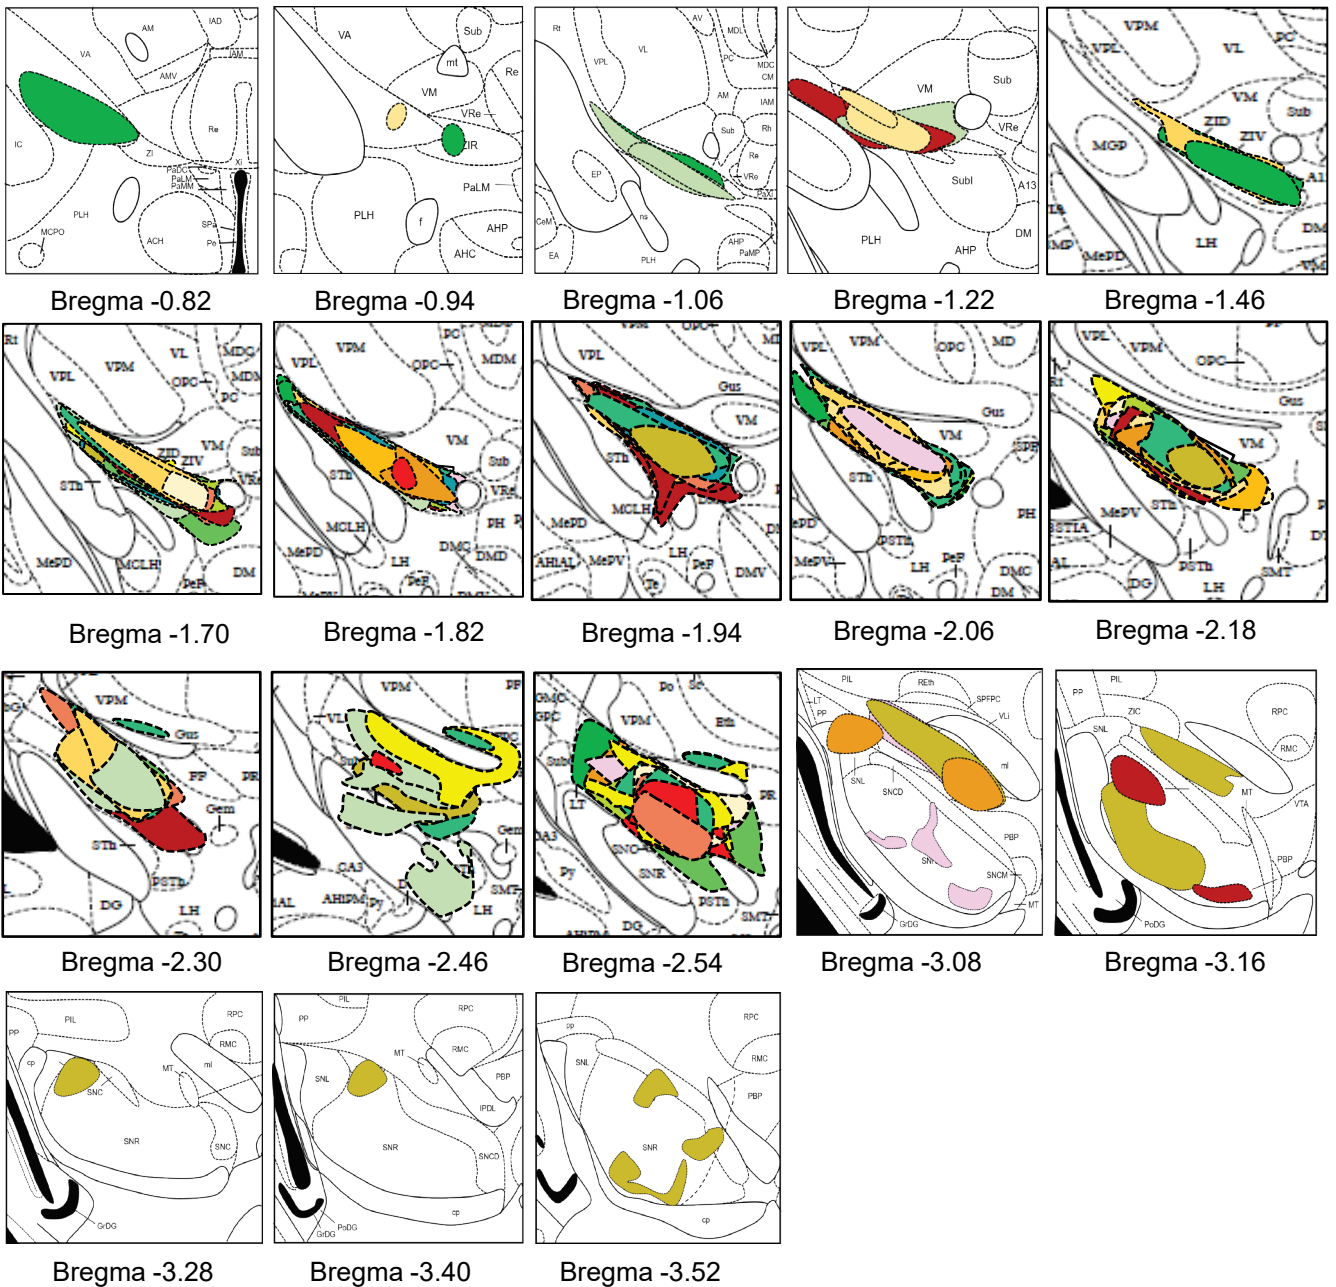

**Figure 6 – supplemental figure 1.** Rostro-caudal distribution of AAV-hSyn-DIO-hM3D(Gq)-mCherry injection sites in mice used for behavioral experiments. Drawings of injection sites throughout the VGAT-Cre mice brains injected with AAV-hSyn-DIO-hM3D(Gq)-mCherry into the ZI. Individual mice are represented in different color.

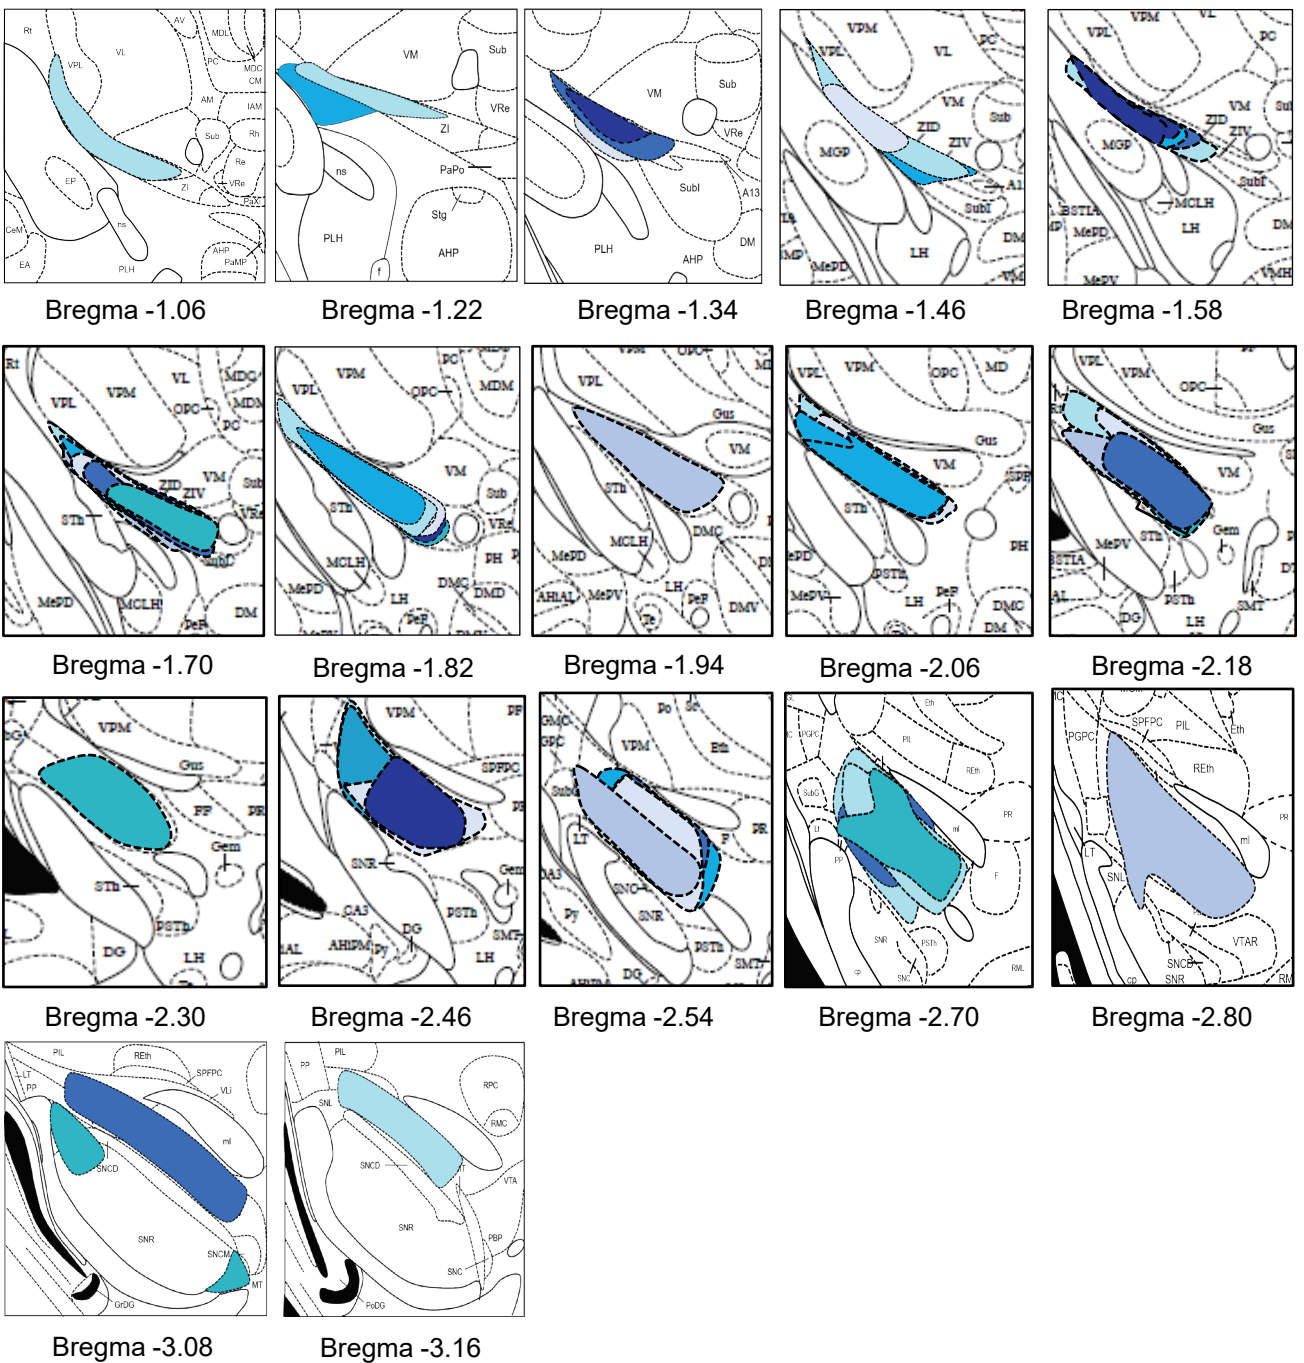

**Figure 6 – supplemental figure 2.** Rostro-caudal distribution of AAV8-hSyn-DIO-mCherry injection sites in mice used for behavioral experiments. Drawings of injection sites throughout the VGAT-Cre mice brains injected with AAV8-hSyn-DIO-mCherry into the ZI. Individual mice are represented in different color.



**Supplemental Table 1. Statistical Analyses**

| Figure                    | Data Structure                                                                           | Type of Test                                                                   | Sample Size                                                                                                                                  | Statistical Data                                                                                                                                                                                                                                                                                                                                                                                                                                                                                                                                                                                             |
|---------------------------|------------------------------------------------------------------------------------------|--------------------------------------------------------------------------------|----------------------------------------------------------------------------------------------------------------------------------------------|--------------------------------------------------------------------------------------------------------------------------------------------------------------------------------------------------------------------------------------------------------------------------------------------------------------------------------------------------------------------------------------------------------------------------------------------------------------------------------------------------------------------------------------------------------------------------------------------------------------|
| <b>Figure 3</b>           |                                                                                          |                                                                                |                                                                                                                                              |                                                                                                                                                                                                                                                                                                                                                                                                                                                                                                                                                                                                              |
| 3D (Ex vivo Optogenetics) | Normal distribution                                                                      | Unpaired two-tailed t-test                                                     | VGAT-positive = 8 cells<br>VGAT-negative = 12 cells                                                                                          | t = 0.3291; df = 18; p = 0.7459; eta squared = 0.005982                                                                                                                                                                                                                                                                                                                                                                                                                                                                                                                                                      |
| <b>Figure 4</b>           |                                                                                          |                                                                                |                                                                                                                                              |                                                                                                                                                                                                                                                                                                                                                                                                                                                                                                                                                                                                              |
| 4A (Gi validation)        | Normal distribution<br>Non-normal distribution                                           | Paired two-tailed t-test<br>Wilcoxon two tailed matched-paired signed rank tes | Saline = 6 cells<br>CNO = 6 cells                                                                                                            | t = 0.98; df = 5; p = 0.3722; eta squared = 0.161<br>p = 0.0313; W = -21.0                                                                                                                                                                                                                                                                                                                                                                                                                                                                                                                                   |
| 4E (Von Frey)             | Normal distribution                                                                      | Two-way ANOVA followed by Dunnett's multiple comparison test                   | n = 8 mice per group                                                                                                                         | Two-way ANOVA: Ipsilateral Paw sciatic nerve and brain treatments: F(1,35) = 0.3491; p = 0.554<br>sciatic nerve and brain treatments: F(1,35) = 188.9; p < 0.000<br><i>posthoc</i> : Dunnett's test<br>***p < 0.0001 for pre-injections vs 1 h after CNO in sham-hM4Di-CNO treatment<br>Two-way ANOVA: Contralateral Paw i.p. treatment: F(2,35) = 96.25; p < 0.000<br>sciatic nerve and brain treatments: F(1,35) = 0.3491; p = 0.554<br><i>posthoc</i> : Dunnett's test<br>***p < 0.0001 and ***p < 0.0001 for pre-injections vs 1 h after CNO in sham-hM4Di-CNO and cuff-hM4Di-CNO treatment respectively |
| 4F (Pinching)             | Normal distribution                                                                      | Two-way ANOVA followed by Dunnett's multiple comparison test                   | Ipsilateral paw- Sham = 8 mice per group<br>Cuff = 6 mice per group<br>Contralateral paw- Sham = 6 mice per group<br>Cuff = 7 mice per group | Two-way ANOVA: Ipsilateral Paw i.p. treatment: F(2,29) = 59.13 ; p < 0.0001<br>sciatic nerve and brain treatments: F(1,29) = 338.7 ; p < 0.000<br><i>posthoc</i> : Dunnett's test<br>***p < 0.0001 for pre-injections vs 1 h after CNO in sham-hM4Di-CNO treatment<br>Two-way ANOVA: Contralateral Paw i.p. treatment: F(2,28) = 210.0 ; p < 0.0001<br>sciatic nerve and brain treatments: F(1,28) = .2574 ; p = 0.615<br><i>posthoc</i> : Dunnett's test<br>***p < 0.0001 and ***p < 0.0001 for pre-injections vs 1 h after CNO in sham-hM4Di-CNO and cuff-hM4Di-CNO treatment respectively                 |
| <b>Figure 5</b>           |                                                                                          |                                                                                |                                                                                                                                              |                                                                                                                                                                                                                                                                                                                                                                                                                                                                                                                                                                                                              |
| 5A (Acetone)              | Normal distribution                                                                      | Two-way ANOVA followed by Dunnett's multiple comparison test                   | n = 8 mice per group                                                                                                                         | Two-way ANOVA: Ipsilateral Paw i.p. treatment: F(2,34) = 0.2743; p = 0.7611<br>sciatic nerve and brain treatments: F(1,34) = 0.0046; p = 0.945<br><i>posthoc</i> : Dunnett's test<br>p = 0.9871 for pre-injections vs 1 h after CNO in sham-hM4Di-CNO treatment<br>Two-way ANOVA: Contralateral Paw i.p. treatment: F(2,32) = 0.018; p = 0.982<br>sciatic nerve and brain treatments: F(1,32) = 1.071; p = 0.308<br><i>posthoc</i> : Dunnett's test<br>p > 0.9999 and p = 0.9790 for pre-injections vs 1 h after CNO in sham-hM4Di-CNO and cuff-hM4Di-CNO treatment respectively                             |
| 5B (Hargreaves)           | Normal distribution                                                                      | Two-way ANOVA followed by Dunnett's multiple comparison test                   | n = 8 mice per group                                                                                                                         | Two-way ANOVA: Ipsilateral Paw i.p. treatment: F(2,36) = 0.1659; p = 0.8471<br>sciatic nerve and brain treatments: F(1,36) = 0.8412; p = 0.773<br><i>posthoc</i> : Dunnett's test<br>p = 0.9089 for pre-injections vs 1 h after CNO in sham-hM4Di-CNO treatment<br>Two-way ANOVA: Contralateral Paw i.p. treatment: F(2,37) = 1.822; p = 0.1761<br>sciatic nerve and brain treatments: F(1,37) = 0.07605; p = 0.784<br><i>posthoc</i> : Dunnett's test<br>p = 0.8940 and p = 0.9040 for pre-injections vs 1 h after CNO in sham-hM4Di-CNO and cuff-hM4Di-CNO treatment respectively                          |
| <b>Figure 6</b>           |                                                                                          |                                                                                |                                                                                                                                              |                                                                                                                                                                                                                                                                                                                                                                                                                                                                                                                                                                                                              |
| 6E (cFos)                 | Normal distribution: HM3Dq-CNO and mCherry-CNO<br>Non-normal distribution: HM3Dq- Saline | One-way ANOVA followed by Tukey's multiple comparisons test                    | HM3Dq-CNO = 7 mice<br>HM3Dq-Saline = 5 mice<br>mCherry-CNO = 3 mice                                                                          | One-way ANOVA: F(2,12) = 10.90; p < 0.001<br><i>posthoc</i> : Tukey's test<br>**p < 0.01 for HM3Dq-CNO vs HM3Dq-Sal<br>*p < 0.05 for HM3Dq-CNO vs mCherry-CNO                                                                                                                                                                                                                                                                                                                                                                                                                                                |
| 6F (Pinching)             | Normal distribution                                                                      | Two-way ANOVA followed by Dunnett's multiple comparison test                   | HM3Dq-Sham = 6 mice per group; HM3Dq-Cuff = 8 mice per group; mCherry-Cuff = 8 mice                                                          | Two-way ANOVA: Ipsilateral Paw i.p. treatment: F(2,38) = 47.13; p < 0.000<br>sciatic nerve and brain treatments: F(1,38) = 31.18; p < 0.000<br><i>posthoc</i> : Dunnett's test<br>***p < 0.0001 for pre-injections vs 1 h after CNO in cuff-HM3Dq-CNO treatment<br>Two-way ANOVA: Contralateral Paw i.p. treatment: F(2,38) = 1.245; p = 0.2991<br>sciatic nerve and brain treatments: F(1,38) = 2.069; p = 0.158<br><i>posthoc</i> : Dunnett's test<br>p = 0.0719 for pre-injections vs 1 h after CNO in cuff-HM3Dq-CNO treatment                                                                           |
| <b>Figure 7</b>           |                                                                                          |                                                                                |                                                                                                                                              |                                                                                                                                                                                                                                                                                                                                                                                                                                                                                                                                                                                                              |
| 7A (Acetone)              | Normal distribution                                                                      | Two-way ANOVA followed by Dunnett's multiple comparison test                   | HM3Dq-Sham = 6 mice per group; HM3Dq-Cuff = 8 mice per group; mCherry-Cuff = 8 mice                                                          | Two-way ANOVA: Ipsilateral Paw i.p. treatment: F(2,34) = 0.1027 ; p = 0.902<br>sciatic nerve and brain treatments: F(1,34) = 0.5246; p = 0.473<br><i>posthoc</i> : Dunnett's test<br>p = 0.7548 for pre-injections vs 1 h after CNO in cuff-HM3Dq-CNO treatment<br>Two-way ANOVA: Contralateral Paw i.p. treatment: F(2,34) = 0.4027 ; p = 0.671<br>sciatic nerve and brain treatments: F(1,34) = 0.2575; p = 0.873<br><i>posthoc</i> : Dunnett's test<br>p = 0.9363 for pre-injections vs 1 h after CNO in cuff-HM3Dq-CNO treatment                                                                         |
| 7B (Hargreaves)           | Normal distribution                                                                      | Two-way ANOVA followed by Dunnett's multiple comparison test                   | HM3Dq-Sham = 6 mice per group; HM3Dq-Cuff = 8 mice per group; mCherry-Cuff = 8 mice                                                          | Two-way ANOVA: Ipsilateral Paw i.p. treatment: F(2,14) = 0.9272 ; p = 0.418<br>sciatic nerve and brain treatments: F(1,14) = 1.036 ; p = 0.325<br><i>posthoc</i> : Dunnett's test<br>p = 0.6771 for pre-injections vs 1 h after CNO in cuff-HM3Dq-CNO treatment<br>Two-way ANOVA: Contralateral Paw i.p. treatment: F(2,14) = 1.057 ; p = 0.373<br>sciatic nerve and brain treatments: F(1,14) = 1.722 ; p = 0.210<br><i>posthoc</i> : Dunnett's test<br>p = 0.5475 for pre-injections vs 1 h after CNO in cuff-HM3Dq-CNO treatment                                                                          |

**Supplemental Table 1. Statistical Analyses** Detailed information about data structure, statistical tests, sample sizes and statistical results; ANOVA = analyses of variance, (df<sub>n</sub>, df<sub>d</sub>): degree of freedom for the numerator of the F ratio, for the denominator of the F ratio; df: degrees of freedom.
